# Supplementary material for: Computational study on epoxidation of propylene by dioxygen using the silanol-functionalized polyoxometalate-supported osmium oxide catalyst
Source: Royal Society of Chemistry journal article supplement (doi:10.1039/c9qi00900k), 2019-01-01
Supplement: c9qi00900k1.pdf [file c9qi00900k1.pdf]

# Computational Study on Epoxidation of Propylene by Dioxygen Using the Silanol-Functionalized Polyoxometalates-Supported Osmium Oxide Catalyst

Yun-Jie Chu,<sup>†</sup> Xue-Mei Chen,<sup>‡</sup> and Chun-Guang Liu<sup>\*†</sup>

*<sup>†</sup> Department of Chemistry, Faculty of Science, Beihua University, Jilin City,  
132013, P. R. China.*

*<sup>‡</sup> College of Chemical Engineering, Northeast Electric Power University, Jilin  
City, 132012, P. R. China*

---

\* Corresponding author.

Phone: 86 0773 5845940, Fax: 86 0773 5845940.

E-mail addresses: [liucg407@163.com](mailto:liucg407@163.com). (C.G.L.)

ORCID: Chun-Guang Liu: 0000-0002-1220-5236

Electronic supplementary information (ESI) available. See DOI: XXXXXXXXXXXX

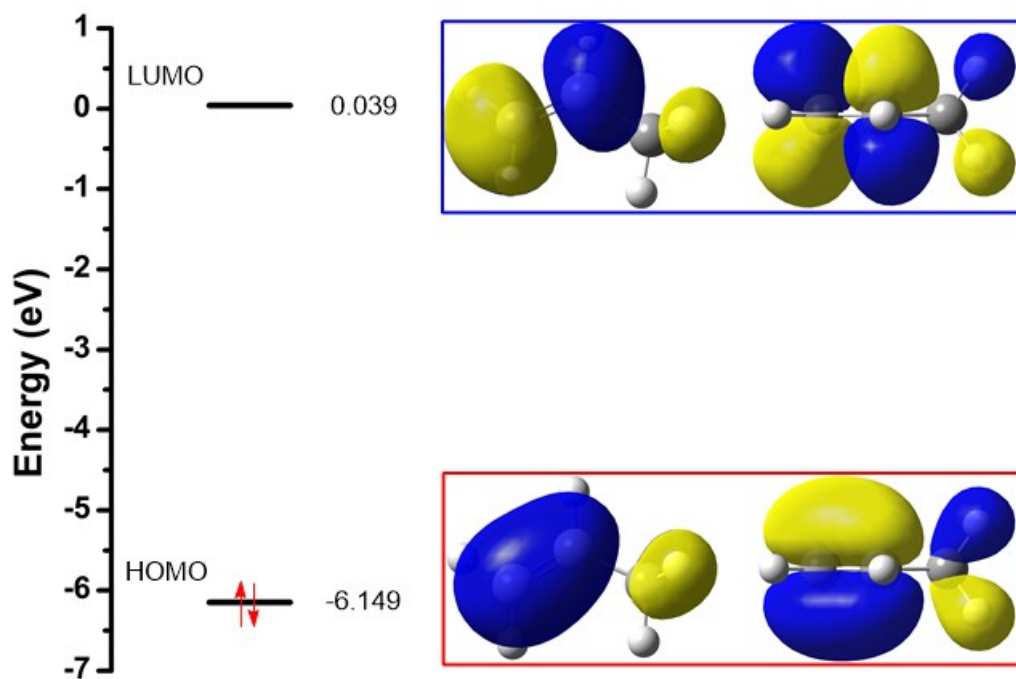

**Fig. S1** The frontier molecular orbitals of propylene molecule

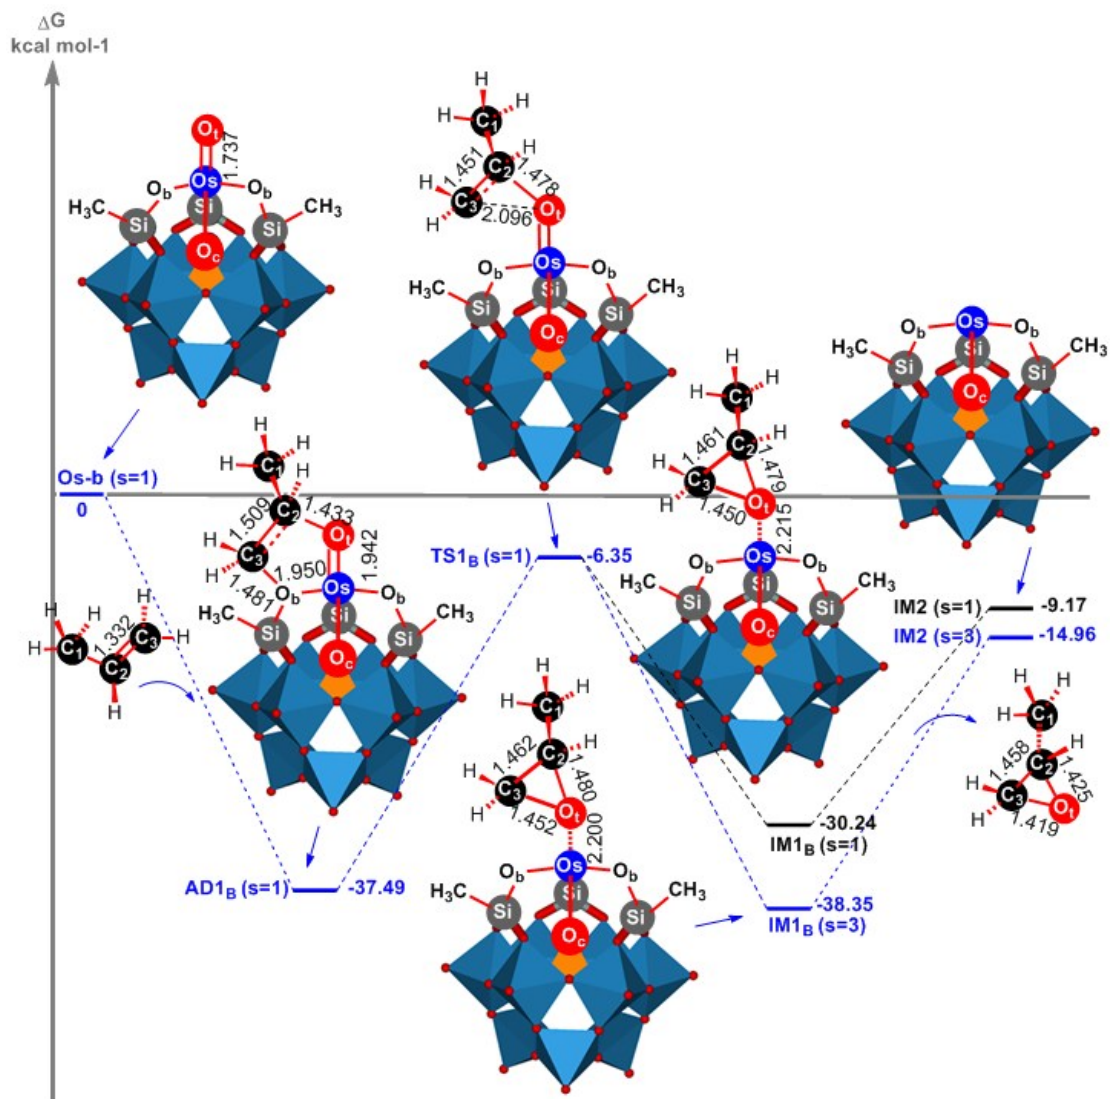

**Fig. S2** The calculated free energy profile for the first oxygen transfer step with bond lengths in angstrom and relative energy in kcal mol<sup>-1</sup>

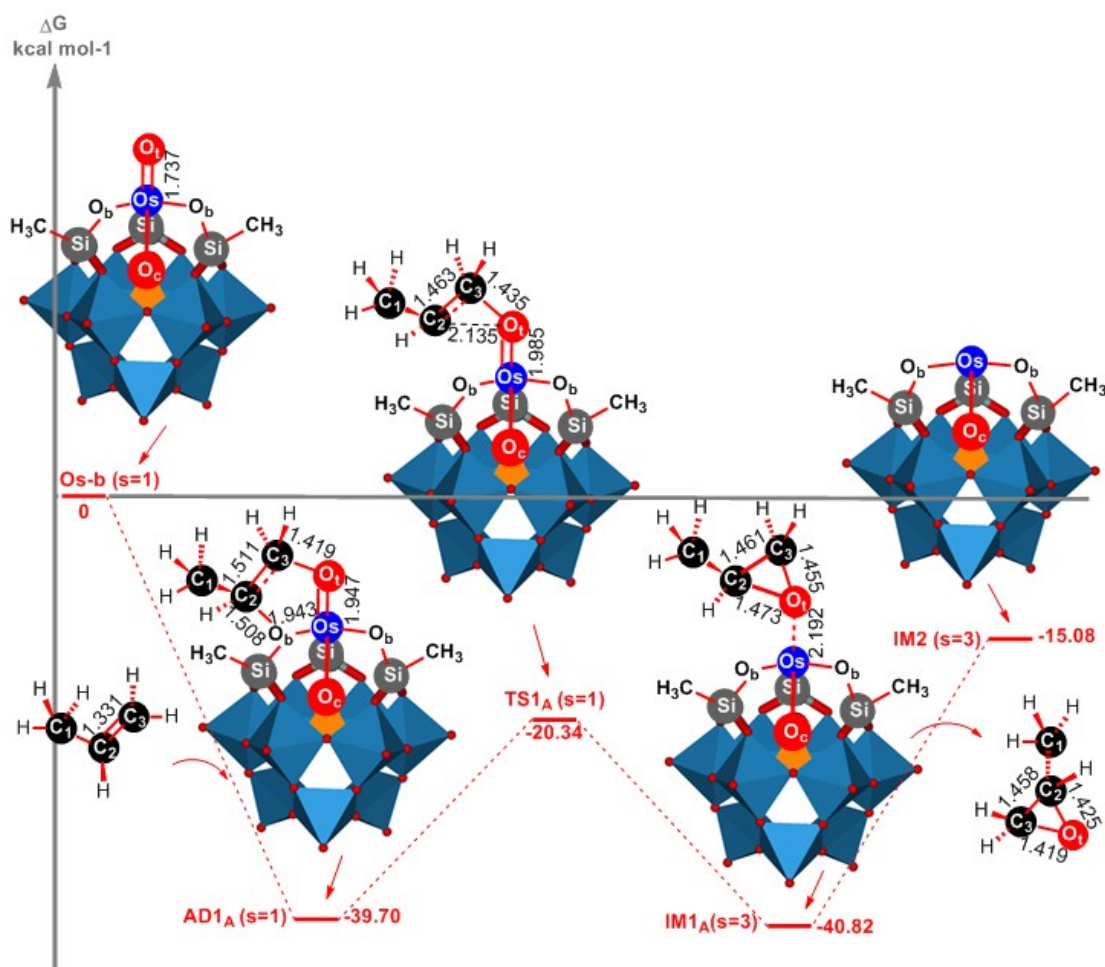

**Fig. S3** The relative energy obtained by fully optimizing each structure of the optimal reaction path in Fig. 5 with larger basis sets

In order to obtain a more accurate energy value and to test the reliability of our computational method, we fully optimize each structure of the optimal reaction path in Figure 5 using a large basis set. The 6-31G(d,p) basis set was used for all non-metal atoms. The base set used for the metal atom is unchanged. The refined energy is shown in Figure S3. The research results show that the energy value and the intermediates and transition states geometric configuration do not change significantly after increasing the basis sets, which also verifies the correctness of our method.

**Os-a**

|    |             |             |             |
|----|-------------|-------------|-------------|
| W  | 3.12385700  | -1.36818900 | -1.42462300 |
| W  | 0.16604400  | -0.67905700 | -3.57416800 |
| W  | -0.01620000 | -3.34151900 | -1.02376800 |
| Si | -2.80869700 | -3.36436900 | 0.68556000  |
| P  | 0.06743800  | 0.07855100  | -0.03015500 |
| O  | 4.28569200  | -2.24865000 | -2.28896200 |
| O  | 0.38777600  | -1.33068300 | -5.12644700 |
| O  | 0.18052100  | -4.86750200 | -1.74527700 |
| O  | 3.82721800  | 0.40814600  | -1.41737700 |
| O  | 1.87606500  | -0.83999600 | -2.82557200 |
| O  | 1.74146400  | -2.68296000 | -1.03143200 |
| O  | -0.38012000 | -2.18097000 | -2.50457100 |
| O  | 0.09925000  | -3.74525200 | 0.85653200  |
| O  | -1.81197100 | -0.24649000 | -3.74253900 |
| O  | -2.01695800 | -3.48036800 | -0.70022200 |
| O  | 1.63035200  | 0.00064500  | 0.00959400  |
| O  | -0.61153900 | -1.28610100 | 0.24975600  |
| O  | -3.86886500 | -1.80938100 | 0.20086800  |
| O  | -5.31056000 | 0.53926000  | -0.27420800 |
| C  | -4.20593800 | -4.52831800 | 0.94683800  |
| W  | 3.06711300  | -0.62014800 | 1.91491800  |
| W  | -0.11361100 | -2.52177700 | 2.34266600  |
| W  | 0.09177300  | 0.98607000  | 3.48176300  |
| Si | -2.66599100 | 2.35502900  | 2.45508200  |
| O  | 4.19171700  | -1.03388400 | 3.11399000  |
| O  | 0.01574900  | -3.56741400 | 3.67501300  |
| O  | 0.34453900  | 1.07733400  | 5.15731900  |
| O  | 3.74238700  | -1.55276800 | 0.38507600  |
| O  | 1.66977900  | -1.95324100 | 2.11108500  |
| O  | 1.79345500  | 0.48841900  | 2.88572500  |
| O  | -0.48235000 | -0.83072400 | 3.15216500  |
| O  | 0.32877100  | 2.78746200  | 2.86204500  |
| O  | -2.09706300 | -2.78892500 | 2.00011800  |
| O  | -1.86298200 | 1.49788600  | 3.53344000  |
| O  | -0.41979700 | 1.10659400  | 1.02009100  |
| O  | -3.13001600 | 0.74450400  | 1.44208300  |
| C  | -4.38201400 | 2.86944600  | 2.87840900  |
| W  | 3.18244100  | 1.91622700  | -0.40045400 |
| W  | 0.10656800  | 3.42967200  | 1.05094000  |
| W  | 0.22239100  | 2.61906200  | -2.54906900 |
| Si | -2.56780900 | 1.04695900  | -3.19126000 |
| O  | 4.40118900  | 3.06692300  | -0.64610100 |
| O  | 0.26811200  | 5.10542900  | 1.28656100  |

|    |             |             |             |
|----|-------------|-------------|-------------|
| O  | 0.45597700  | 4.01706300  | -3.48561500 |
| O  | 3.79018000  | 0.99810600  | 1.16851200  |
| O  | 1.87256200  | 2.88496600  | 0.64805400  |
| O  | 1.93447600  | 2.29192700  | -1.85591400 |
| O  | -0.26808400 | 3.31233700  | -0.82038500 |
| O  | 0.41517400  | 1.21284500  | -3.85671500 |
| O  | -1.90157900 | 3.29451000  | 1.41372100  |
| O  | -1.77585800 | 2.39377100  | -2.87919000 |
| O  | -0.30088400 | 0.53286400  | -1.48578400 |
| O  | -2.73868900 | 0.38863200  | -1.36243700 |
| C  | -4.33983900 | 1.22235400  | -3.65741400 |
| H  | -4.34158800 | 3.74300900  | 3.53855800  |
| H  | -4.94696400 | 3.16119000  | 1.98760300  |
| H  | -4.91591300 | 2.07425900  | 3.40601300  |
| H  | -4.39378400 | 1.52808700  | -4.70830400 |
| H  | -4.88054700 | 0.27546500  | -3.56654400 |
| H  | -4.84546000 | 1.99202400  | -3.06727400 |
| H  | -3.81133700 | -5.51823100 | 1.20098800  |
| H  | -4.84347400 | -4.20047000 | 1.77277100  |
| H  | -4.80798100 | -4.62975200 | 0.03949500  |
| Os | -3.72921000 | -0.06385500 | 0.00927600  |

**Os-b**

|    |             |             |             |
|----|-------------|-------------|-------------|
| W  | -0.06523400 | 1.88461800  | 2.94538900  |
| W  | -2.97406500 | 2.05578600  | 0.65500400  |
| W  | 0.29328300  | 3.55306200  | -0.21752700 |
| Si | 1.10649400  | 2.64654200  | -3.29963000 |
| P  | -0.12620500 | 0.00416100  | -0.52958000 |
| O  | -0.17126700 | 2.75012800  | 4.39818400  |
| O  | -4.09730800 | 3.20582700  | 1.19296300  |
| O  | 0.28193900  | 5.24909400  | -0.28711300 |
| O  | -0.52804800 | 0.09991500  | 3.44592800  |
| O  | -1.80642400 | 1.96192900  | 2.15397900  |
| O  | 0.39306700  | 3.25908100  | 1.65078300  |
| O  | -1.57122600 | 3.09234600  | -0.14103000 |
| O  | 2.19705000  | 3.19404800  | -0.50027000 |
| O  | -3.75779500 | 1.71747300  | -1.13753800 |
| O  | 0.07608500  | 3.11756900  | -2.15779200 |
| O  | 0.71487800  | 1.18633400  | -0.03774600 |
| O  | 0.06220800  | -0.03666400 | -2.14876500 |
| O  | 0.08792800  | 1.47154900  | -4.27590000 |
| O  | -1.84784100 | 0.06898100  | -5.30740400 |
| C  | 1.51272600  | 3.84143600  | -4.63755900 |
| W  | 2.79507900  | -0.23364300 | 2.20753300  |

|    |             |             |             |
|----|-------------|-------------|-------------|
| W  | 3.11764400  | 1.56255300  | -0.91925700 |
| W  | 2.77215000  | -2.15161800 | -0.86088600 |
| Si | 0.57978800  | -2.89129400 | -3.20894500 |
| O  | 4.07895300  | -0.33341600 | 3.30731700  |
| O  | 4.68344400  | 2.07828200  | -1.31992500 |
| O  | 4.21279800  | -2.96288100 | -1.24064200 |
| O  | 1.71243900  | 1.20801300  | 2.87344700  |
| O  | 3.40160500  | 1.02074300  | 0.88060200  |
| O  | 3.16439800  | -1.61507100 | 0.92249600  |
| O  | 3.05421500  | -0.31031000 | -1.30511600 |
| O  | 1.55776700  | -3.56129400 | -0.39534400 |
| O  | 2.30895600  | 1.73787000  | -2.74400200 |
| O  | 1.94136600  | -2.22576300 | -2.67427900 |
| O  | 0.47754100  | -1.29457600 | 0.01110300  |
| O  | -0.18917300 | -1.57832100 | -4.21548000 |
| C  | 0.74355300  | -4.19834000 | -4.49275600 |
| W  | -0.41746200 | -1.75632200 | 2.99900600  |
| W  | -0.37940500 | -3.54640200 | -0.11029500 |
| W  | -3.30918400 | -1.43445100 | 0.71120400  |
| Si | -3.94933000 | 0.34836900  | -1.96682600 |
| O  | -0.66266300 | -2.54373400 | 4.47890600  |
| O  | -0.71034500 | -5.21175300 | -0.14158900 |
| O  | -4.63889000 | -2.33283400 | 1.25754600  |
| O  | 1.46240200  | -1.41377000 | 2.90890100  |
| O  | -0.20961400 | -3.22467800 | 1.75089700  |
| O  | -2.15375400 | -1.54487600 | 2.22823400  |
| O  | -2.11889100 | -2.74336500 | -0.03809700 |
| O  | -3.77472200 | 0.37279800  | 1.16825700  |
| O  | -0.51872900 | -3.11280300 | -2.05368900 |
| O  | -3.97787900 | -1.01592300 | -1.11132200 |
| O  | -1.62114800 | 0.15218100  | -0.23379500 |
| O  | -2.34426100 | 0.24617500  | -2.79700100 |
| C  | -5.11456800 | 0.42271100  | -3.38808700 |
| H  | 1.19273400  | -5.09281900 | -4.04754000 |
| H  | -0.23422100 | -4.47477300 | -4.89809600 |
| H  | 1.38675500  | -3.86760100 | -5.31331800 |
| H  | -4.93416000 | 1.31162000  | -3.99987600 |
| H  | -5.02186100 | -0.46561400 | -4.02028700 |
| H  | -6.14514000 | 0.46813000  | -3.01983800 |
| H  | 2.12900100  | 4.65050000  | -4.23078900 |
| H  | 2.07498600  | 3.35532100  | -5.43994900 |
| H  | 0.60382500  | 4.28242300  | -5.05727700 |
| Os | -0.91522800 | 0.03509100  | -3.84234500 |

**AD1<sub>A</sub>**

|    |             |             |             |
|----|-------------|-------------|-------------|
| W  | -3.12729900 | 0.54194300  | 1.47640700  |
| W  | -0.32911600 | 2.75685500  | 2.45473500  |
| W  | -0.48901700 | -0.79373000 | 3.47195700  |
| Si | 2.45114700  | -2.19253100 | 2.85554600  |
| P  | 0.49688700  | 0.07491800  | 0.13128700  |
| O  | -4.65693100 | 0.89537600  | 2.11268700  |
| O  | -0.76194700 | 3.80813700  | 3.71445400  |
| O  | -0.71279400 | -1.04877600 | 5.13732000  |
| O  | -3.16313600 | 1.33901600  | -0.25908200 |
| O  | -2.02659900 | 2.02293600  | 1.98364700  |
| O  | -2.26786000 | -0.41245700 | 2.92092500  |
| O  | -0.08365700 | 1.06981900  | 3.35002000  |
| O  | -0.57839800 | -2.63423600 | 2.80914900  |
| O  | 1.63655200  | 3.05748700  | 2.48632500  |
| O  | 1.48813300  | -1.00243300 | 3.34847100  |
| O  | -0.38425000 | -0.77177200 | 1.06572200  |
| O  | 1.98560300  | -0.51548800 | 0.15561200  |
| O  | 3.78003300  | -1.27010500 | 2.01786000  |
| O  | 5.65841100  | 0.42753600  | 1.11806600  |
| C  | 3.43385600  | -3.07284900 | 4.13778000  |
| W  | -2.70161600 | -2.06375800 | -1.00356500 |
| W  | -0.07727200 | -3.39067400 | 1.12700000  |
| W  | 0.60485200  | -2.52042200 | -2.42664000 |
| Si | 3.40952100  | -0.89352200 | -2.50874300 |
| O  | -3.98963100 | -3.05170300 | -1.48891600 |
| O  | -0.14593100 | -5.06318700 | 1.40695700  |
| O  | 0.77483700  | -3.87318300 | -3.43708400 |
| O  | -3.37967900 | -1.08641600 | 0.48988900  |
| O  | -1.75692400 | -3.13857500 | 0.28084800  |
| O  | -1.27667300 | -2.50147100 | -2.22896500 |
| O  | 0.65057200  | -3.17729200 | -0.63991500 |
| O  | 0.70307000  | -1.02725300 | -3.62405700 |
| O  | 1.81175400  | -3.09451500 | 1.69039700  |
| O  | 2.57406500  | -2.19352200 | -2.11358600 |
| O  | -0.01610500 | -0.13093000 | -1.30871500 |
| O  | 4.50079400  | -0.57705400 | -0.96716000 |
| C  | 4.68533600  | -1.14727200 | -3.81893100 |
| W  | -2.46941900 | 1.38166600  | -2.03761700 |
| W  | 0.80411900  | 0.90840000  | -3.31557000 |
| W  | 0.24885600  | 3.61654100  | -0.87557600 |
| Si | 2.68136500  | 3.32444800  | 1.28872900  |
| O  | -3.71073100 | 2.10862700  | -2.93220600 |
| O  | 1.25310100  | 1.41832800  | -4.87480000 |



|    |             |             |             |
|----|-------------|-------------|-------------|
| O  | 0.13231800  | 5.14899200  | -1.59396900 |
| O  | -2.91526700 | -0.47105700 | -2.05436100 |
| O  | -1.07368400 | 1.14372700  | -3.36810800 |
| O  | -1.40210400 | 2.84882300  | -1.40117000 |
| O  | 0.97250900  | 2.49674000  | -2.27630800 |
| O  | -0.39005500 | 3.91941800  | 0.91623600  |
| O  | 2.62822700  | 0.50381100  | -2.55010400 |
| O  | 2.07122400  | 3.82360400  | -0.11662200 |
| O  | 0.56028300  | 1.56338000  | 0.51607800  |
| O  | 3.31480700  | 1.70109300  | 0.77997800  |
| C  | 4.24455000  | 4.15073700  | 1.80360200  |
| H  | 5.28688500  | -0.25557000 | -4.01989400 |
| H  | 5.34025900  | -2.00520100 | -3.63619400 |
| H  | 4.12956600  | -1.36688100 | -4.73939700 |
| H  | 4.03782900  | 5.17831600  | 2.12052200  |
| H  | 4.71068000  | 3.62683500  | 2.64367300  |
| H  | 4.95690600  | 4.19046500  | 0.97372200  |
| H  | 3.95784800  | -2.36436300 | 4.78632000  |
| H  | 2.76737000  | -3.67516500 | 4.76425300  |
| H  | 4.16807700  | -3.74624800 | 3.68553000  |
| Os | 3.79589200  | -0.00434900 | 0.75016700  |
| C  | 5.99981500  | -0.73147800 | -0.95794200 |
| C  | 6.47509000  | 0.37161200  | -0.04029700 |
| H  | 6.30112900  | -0.55526900 | -1.99450700 |
| H  | 7.50982200  | 0.20131700  | 0.28034400  |
| H  | 6.43037700  | 1.34995100  | -0.54506100 |
| C  | 6.30841900  | -2.13206000 | -0.50012200 |
| H  | 6.01784300  | -2.27898100 | 0.54706000  |
| H  | 5.78559600  | -2.87434100 | -1.11192300 |
| H  | 7.38477500  | -2.31797700 | -0.58032100 |

**AD1<sub>B</sub>**

|    |             |             |             |
|----|-------------|-------------|-------------|
| W  | -1.94424600 | 1.58327400  | -2.47732400 |
| W  | 1.18008700  | 0.12435500  | -3.26648900 |
| W  | 1.14456600  | 3.24855000  | -1.30952600 |
| Si | 3.20716600  | 2.69068100  | 1.16372000  |
| P  | 0.34659900  | -0.03138400 | 0.18765800  |
| O  | -2.89004000 | 2.44841200  | -3.58521500 |
| O  | 1.90131000  | 0.23788000  | -4.80308700 |
| O  | 1.49833700  | 4.63175100  | -2.22695400 |
| O  | -2.86192800 | -0.08868300 | -2.31884500 |
| O  | -0.55670200 | 0.80586800  | -3.59384200 |
| O  | -0.59443600 | 2.84445400  | -1.93735600 |
| O  | 1.66716700  | 1.77576200  | -2.44759700 |

|    |             |             |             |
|----|-------------|-------------|-------------|
| O  | 0.45012500  | 3.98332100  | 0.33727300  |
| O  | 2.74808000  | -0.56799600 | -2.19207000 |
| O  | 2.88188700  | 3.11539700  | -0.35784200 |
| O  | 0.76942800  | 1.44178400  | 0.33278600  |
| O  | 1.58889500  | -0.97797200 | 0.53395400  |
| O  | 3.37171700  | 0.91097500  | 0.94245000  |
| O  | 5.33014100  | -0.72739000 | 1.66665900  |
| C  | 4.88354100  | 3.15318800  | 1.77263800  |
| W  | -3.09268700 | 1.46151000  | 1.02381500  |
| W  | 0.07218600  | 3.10475000  | 2.00682100  |
| W  | -1.06380500 | -0.09239000 | 3.46785900  |
| Si | 1.42859400  | -2.28177600 | 3.39166600  |
| O  | -4.52955700 | 2.28366200  | 1.38298600  |
| O  | -0.17321400 | 4.41894900  | 3.05166600  |
| O  | -1.45521300 | -0.03901100 | 5.12100700  |
| O  | -2.72815300 | 1.96043600  | -0.79050800 |
| O  | -1.70504100 | 2.71773900  | 1.46044500  |
| O  | -2.66481600 | 0.60072300  | 2.69657400  |
| O  | -0.19700500 | 1.56657800  | 3.16047200  |
| O  | -1.57748600 | -1.95119500 | 3.04091600  |
| O  | 2.03179400  | 2.89616900  | 2.24791400  |
| O  | 0.79079200  | -0.81583200 | 3.57081200  |
| O  | -0.82331800 | -0.41291000 | 1.11359200  |
| O  | 3.03445700  | -1.86138800 | 2.61068900  |
| C  | 2.02303900  | -3.14840100 | 4.90109800  |
| W  | -3.15676500 | -1.49636200 | -1.05881600 |
| W  | -1.17306700 | -3.06645000 | 1.55698300  |
| W  | 0.01934700  | -2.97078900 | -1.97025500 |
| Si | 3.14108700  | -2.09988400 | -1.93033700 |
| O  | -4.61576200 | -2.19987700 | -1.55563800 |
| O  | -1.70855800 | -4.60359200 | 2.03587100  |
| O  | -0.06916900 | -4.47206600 | -2.75736100 |
| O  | -3.68628200 | -0.16851400 | 0.21589200  |
| O  | -2.63324200 | -2.54143400 | 0.46985200  |
| O  | -1.80686200 | -2.47456800 | -2.03077400 |
| O  | -0.25600800 | -3.30702800 | -0.12381200 |
| O  | 0.61651500  | -1.74917600 | -3.33069900 |
| O  | 0.67842300  | -3.18599900 | 2.29713600  |
| O  | 1.97451900  | -3.08445200 | -1.47471700 |
| O  | -0.07412100 | -0.36774500 | -1.25930900 |
| O  | 4.13253800  | -1.86943400 | -0.30940100 |
| C  | 4.42521300  | -2.79015800 | -3.05953600 |
| H  | 2.58250300  | -4.05283100 | 4.64454100  |
| H  | 2.66034300  | -2.49799200 | 5.50719700  |

|    |            |             |             |
|----|------------|-------------|-------------|
| H  | 1.16478200 | -3.44718400 | 5.51244400  |
| H  | 5.26000200 | -2.10083700 | -3.22605300 |
| H  | 4.80420400 | -3.77028900 | -2.75466900 |
| H  | 3.93394500 | -2.92535200 | -4.03152900 |
| H  | 5.18816500 | 2.51513500  | 2.60871600  |
| H  | 5.62651600 | 3.06861100  | 0.97435700  |
| H  | 4.88023500 | 4.18972100  | 2.12539300  |
| Os | 3.44839300 | -0.84317100 | 1.20143300  |
| C  | 5.54131600 | -2.28294700 | -0.11321300 |
| C  | 6.21022100 | -1.14264000 | 0.61464700  |
| H  | 5.50580800 | -3.20596800 | 0.47431700  |
| H  | 5.95568800 | -2.48193700 | -1.10343500 |
| H  | 7.12344600 | -1.50445300 | 1.10521800  |
| C  | 6.52140100 | 0.04208500  | -0.28374500 |
| H  | 6.90595300 | 0.87408900  | 0.31239400  |
| H  | 7.28135300 | -0.22693200 | -1.02566600 |
| H  | 5.62653200 | 0.38803700  | -0.81886300 |

#### AD1c

|    |             |             |             |
|----|-------------|-------------|-------------|
| W  | 0.01228000  | 1.87050200  | 2.99420500  |
| W  | -2.88803900 | 2.22404200  | 0.72462800  |
| W  | 0.43498100  | 3.62313700  | -0.09476700 |
| Si | 1.19823900  | 2.78681100  | -3.21592000 |
| P  | -0.13004600 | 0.12728800  | -0.52941700 |
| O  | -0.06933300 | 2.67114900  | 4.48534400  |
| O  | -3.97470900 | 3.39674900  | 1.29143900  |
| O  | 0.48843900  | 5.32031900  | -0.12343800 |
| O  | -0.51741800 | 0.08003400  | 3.41871700  |
| O  | -1.73345300 | 2.04076100  | 2.22365000  |
| O  | 0.51803000  | 3.28651200  | 1.77352000  |
| O  | -1.44928900 | 3.24274800  | -0.02546300 |
| O  | 2.31978500  | 3.19990000  | -0.38004500 |
| O  | -3.65853200 | 1.97771000  | -1.09422600 |
| O  | 0.19651800  | 3.23912000  | -2.03651900 |
| O  | 0.74744000  | 1.23030600  | 0.07746300  |
| O  | 0.06046200  | 0.19241200  | -2.13443000 |
| O  | 0.16331800  | 1.70454100  | -4.24091600 |
| O  | -1.86201500 | 0.45271900  | -5.30595100 |
| C  | 1.64858600  | 4.05390200  | -4.47319500 |
| W  | 2.79137200  | -0.31520900 | 2.17786400  |
| W  | 3.18893400  | 1.56344400  | -0.88530300 |
| W  | 2.66822600  | -2.12970500 | -0.95470400 |
| Si | 0.45934800  | -2.66098300 | -3.33297800 |
| O  | 4.07455500  | -0.52156800 | 3.26466600  |

|    |             |             |             |
|----|-------------|-------------|-------------|
| O  | 4.77732700  | 2.03149400  | -1.25536000 |
| O  | 4.07442400  | -2.98607100 | -1.36776400 |
| O  | 1.76893800  | 1.12874100  | 2.92091700  |
| O  | 3.45283500  | 0.94891400  | 0.90372700  |
| O  | 3.08213400  | -1.67196800 | 0.84067200  |
| O  | 3.04952900  | -0.28320900 | -1.32798900 |
| O  | 1.40682000  | -3.51731200 | -0.55718100 |
| O  | 2.39811100  | 1.85194200  | -2.69196100 |
| O  | 1.83699100  | -2.06699800 | -2.76750700 |
| O  | 0.41855600  | -1.23367300 | -0.08428800 |
| O  | -0.29629600 | -1.32494800 | -4.30120600 |
| C  | 0.64781200  | -3.93758800 | -4.65441400 |
| W  | -0.46650200 | -1.75863900 | 2.91277300  |
| W  | -0.52950800 | -3.42856700 | -0.26810600 |
| W  | -3.36783800 | -1.24841600 | 0.67103000  |
| Si | -3.93443700 | 0.63791200  | -1.94071500 |
| O  | -0.73461400 | -2.59050700 | 4.36484600  |
| O  | -0.92947700 | -5.07831200 | -0.34902500 |
| O  | -4.72495500 | -2.11936600 | 1.19842600  |
| O  | 1.41667400  | -1.48623600 | 2.83376900  |
| O  | -0.33920800 | -3.18217800 | 1.60260800  |
| O  | -2.20853900 | -1.45924000 | 2.16126100  |
| O  | -2.23887400 | -2.56657800 | -0.16316700 |
| O  | -3.76381600 | 0.56143700  | 1.18360800  |
| O  | -0.65379500 | -2.95353100 | -2.20804500 |
| O  | -4.06401500 | -0.74588200 | -1.12540700 |
| O  | -1.62345100 | 0.30429800  | -0.22618000 |
| O  | -2.38063800 | 0.34089500  | -2.79768200 |
| C  | -5.11188900 | 0.82412600  | -3.34841600 |
| H  | 1.19838700  | -4.78798100 | -4.23619600 |
| H  | -0.31343900 | -4.31647800 | -5.01601700 |
| H  | 1.22599700  | -3.55687200 | -5.50232400 |
| H  | -5.26780400 | -0.13318000 | -3.85658400 |
| H  | -6.08303900 | 1.17008300  | -2.97891300 |
| H  | -4.75250500 | 1.55748300  | -4.07744100 |
| H  | 2.28182100  | 4.81929200  | -4.01187800 |
| H  | 2.20704500  | 3.60579700  | -5.30027300 |
| H  | 0.75765000  | 4.54576400  | -4.87473500 |
| Os | -0.92504800 | 0.31303800  | -3.82798700 |
| C  | -1.79551900 | -1.83561800 | -6.65855800 |
| C  | -2.91804900 | -1.75445900 | -5.89861100 |
| H  | -1.00798300 | -2.55143000 | -6.43353400 |
| H  | -1.66433600 | -1.20924700 | -7.53658700 |
| H  | -3.69651000 | -1.05684600 | -6.21305400 |

|   |             |             |             |
|---|-------------|-------------|-------------|
| C | -3.18260000 | -2.54739800 | -4.67949600 |
| H | -4.15371600 | -3.05553300 | -4.74727600 |
| H | -2.40647700 | -3.29124700 | -4.47587500 |
| H | -3.25928800 | -1.90705200 | -3.78482300 |

**TS1<sub>A</sub>**

|    |             |             |             |
|----|-------------|-------------|-------------|
| W  | -3.16191200 | 0.70682300  | 1.54503700  |
| W  | -0.19873800 | 2.73818500  | 2.43365700  |
| W  | -0.56044800 | -0.79553400 | 3.45599700  |
| Si | 2.24356400  | -2.40484700 | 2.76623300  |
| P  | 0.33275400  | 0.01414200  | 0.08419900  |
| O  | -4.64859600 | 1.16720100  | 2.21463000  |
| O  | -0.50660900 | 3.81782800  | 3.70650700  |
| O  | -0.71281000 | -1.04755600 | 5.13047200  |
| O  | -3.17757400 | 1.49708900  | -0.18391000 |
| O  | -1.95134200 | 2.11684400  | 2.02982200  |
| O  | -2.32658400 | -0.28998900 | 2.98740100  |
| O  | -0.02712800 | 1.03974700  | 3.32122100  |
| O  | -0.78253800 | -2.62054600 | 2.79751500  |
| O  | 1.78633500  | 2.89936100  | 2.37655500  |
| O  | 1.40368500  | -1.11012800 | 3.22478600  |
| O  | -0.57582300 | -0.76088800 | 1.04555300  |
| O  | 1.78589000  | -0.69616600 | 0.08870900  |
| O  | 3.61516800  | -1.61953600 | 1.85742200  |
| O  | 5.49666000  | 0.08291200  | 1.08461600  |
| C  | 3.14359800  | -3.34395700 | 4.06593000  |
| W  | -2.99802700 | -1.93464400 | -0.92945600 |
| W  | -0.40685400 | -3.43629400 | 1.09793900  |
| W  | 0.22941700  | -2.58565600 | -2.47804300 |
| Si | 3.18715500  | -1.13782600 | -2.45313400 |
| O  | -4.37525600 | -2.81755000 | -1.37246000 |
| O  | -0.56122800 | -5.10125300 | 1.39220100  |
| O  | 0.27579100  | -3.94309500 | -3.49489700 |
| O  | -3.54982800 | -0.90811400 | 0.58907800  |
| O  | -2.10488400 | -3.07947700 | 0.33841100  |
| O  | -1.65280200 | -2.47364500 | -2.18795200 |
| O  | 0.26669100  | -3.25809800 | -0.67325800 |
| O  | 0.33553000  | -1.10518900 | -3.67504900 |
| O  | 1.51988300  | -3.25711100 | 1.61390800  |
| O  | 2.18023300  | -2.37000600 | -2.20655300 |
| O  | -0.20417900 | -0.17394300 | -1.34207000 |
| O  | 4.20586400  | -0.88914400 | -1.00980400 |
| C  | 4.51981600  | -1.49135500 | -3.68965700 |
| W  | -2.56237700 | 1.49346500  | -2.00160000 |

|    |             |             |             |
|----|-------------|-------------|-------------|
| W  | 0.64440600  | 0.81048500  | -3.36750600 |
| W  | 0.30188900  | 3.57298900  | -0.93141700 |
| Si | 2.78631600  | 3.09481000  | 1.12840100  |
| O  | -3.79633300 | 2.28601400  | -2.85049200 |
| O  | 1.06436300  | 1.30075600  | -4.94004000 |
| O  | 0.25744700  | 5.10989700  | -1.64870900 |
| O  | -3.12562100 | -0.32589500 | -1.97073200 |
| O  | -1.23298100 | 1.18013400  | -3.35941500 |
| O  | -1.40770500 | 2.91635900  | -1.39937100 |
| O  | 0.91679300  | 2.39225200  | -2.33188600 |
| O  | -0.23844500 | 3.89798000  | 0.88971900  |
| O  | 2.41655200  | 0.26936900  | -2.66388500 |
| O  | 2.16223400  | 3.67042400  | -0.23971100 |
| O  | 0.54512700  | 1.48841500  | 0.45468100  |
| O  | 3.28056600  | 1.45032000  | 0.57136500  |
| C  | 4.42664700  | 3.80601500  | 1.58880300  |
| H  | 5.18113200  | -0.63200900 | -3.84353900 |
| H  | 5.11936000  | -2.36185600 | -3.40338400 |
| H  | 4.05412500  | -1.71891900 | -4.65500000 |
| H  | 4.28657400  | 4.78488200  | 2.05918500  |
| H  | 4.95140100  | 3.16668200  | 2.30687000  |
| H  | 5.05734000  | 3.94880100  | 0.70566300  |
| H  | 3.76363700  | -2.67857400 | 4.67425900  |
| H  | 2.42336100  | -3.83247900 | 4.73092900  |
| H  | 3.77854300  | -4.12056600 | 3.62956400  |
| Os | 3.60065100  | -0.30246500 | 0.64261000  |
| C  | 6.77951300  | -0.40377900 | -0.55259100 |
| C  | 6.37323500  | 0.78698300  | 0.19368700  |
| H  | 6.38099500  | -0.56893500 | -1.55088800 |
| H  | 7.16255400  | 1.26065900  | 0.78851500  |
| H  | 5.83788800  | 1.53898500  | -0.39941500 |
| C  | 7.60626600  | -1.44700100 | 0.03925700  |
| H  | 7.91000200  | -1.23528900 | 1.06664100  |
| H  | 7.10176800  | -2.42310800 | -0.00675400 |
| H  | 8.50092900  | -1.57553900 | -0.59355100 |

**TS1<sub>B</sub>**

|    |             |             |             |
|----|-------------|-------------|-------------|
| W  | -1.96433500 | 1.64677900  | -2.44968900 |
| W  | 1.11132600  | 0.09479200  | -3.32823600 |
| W  | 1.20130200  | 3.20911700  | -1.34295800 |
| Si | 3.28682300  | 2.54991000  | 1.08133800  |
| P  | 0.31940100  | -0.05082100 | 0.14245100  |
| O  | -2.90469300 | 2.55070100  | -3.53130200 |
| O  | 1.77729100  | 0.22317300  | -4.88700300 |

|    |             |             |             |
|----|-------------|-------------|-------------|
| O  | 1.56992700  | 4.59243300  | -2.25440400 |
| O  | -2.93048900 | 0.00905000  | -2.26956700 |
| O  | -0.62206700 | 0.85182500  | -3.58614600 |
| O  | -0.56664300 | 2.86389700  | -1.90830600 |
| O  | 1.65389600  | 1.73411300  | -2.50035000 |
| O  | 0.57425700  | 3.93870500  | 0.34079500  |
| O  | 2.64493200  | -0.67985100 | -2.32806200 |
| O  | 2.95578900  | 3.02218000  | -0.42465000 |
| O  | 0.82754100  | 1.38946200  | 0.29610000  |
| O  | 1.55026000  | -1.04191900 | 0.48367800  |
| O  | 3.44545300  | 0.77642700  | 0.80040300  |
| O  | 5.28406400  | -0.96492300 | 1.61105400  |
| C  | 4.96163300  | 3.02172100  | 1.70826000  |
| W  | -3.04566700 | 1.53890900  | 1.07621300  |
| W  | 0.19358500  | 3.06520200  | 2.00786200  |
| W  | -1.01081600 | -0.11435900 | 3.45695800  |
| Si | 1.40372900  | -2.37899900 | 3.31583000  |
| O  | -4.44910400 | 2.39976200  | 1.47590800  |
| O  | 0.02610500  | 4.37594500  | 3.07215800  |
| O  | -1.35001000 | -0.07633700 | 5.12217300  |
| O  | -2.70227500 | 2.03961100  | -0.73531500 |
| O  | -1.60694600 | 2.74715100  | 1.49860600  |
| O  | -2.60190600 | 0.64485800  | 2.73326000  |
| O  | -0.09977400 | 1.52192600  | 3.14734400  |
| O  | -1.57446900 | -1.94576800 | 3.01690500  |
| O  | 2.14732800  | 2.75729800  | 2.20135100  |
| O  | 0.83759000  | -0.88090400 | 3.48569400  |
| O  | -0.83970400 | -0.40292300 | 1.08311900  |
| O  | 3.00531300  | -2.04219200 | 2.49064600  |
| C  | 1.96445000  | -3.26631600 | 4.82541500  |
| W  | -3.25690200 | -1.40583100 | -1.01839100 |
| W  | -1.25503300 | -3.07175000 | 1.50547500  |
| W  | -0.13958600 | -2.95641300 | -2.05425800 |
| Si | 3.05375700  | -2.18363000 | -1.89463500 |
| O  | -4.75118000 | -2.04892100 | -1.49362900 |
| O  | -1.81440300 | -4.59984300 | 1.98780200  |
| O  | -0.31800300 | -4.43863300 | -2.86113100 |
| O  | -3.70648500 | -0.06811800 | 0.27837800  |
| O  | -2.74310500 | -2.48234800 | 0.49359300  |
| O  | -1.96265800 | -2.40807400 | -2.02079300 |
| O  | -0.39628500 | -3.30669900 | -0.18429400 |
| O  | 0.41288700  | -1.73327300 | -3.41680400 |
| O  | 0.61360700  | -3.24542500 | 2.21762600  |
| O  | 1.78577700  | -3.12668600 | -1.60478300 |

|    |             |             |             |
|----|-------------|-------------|-------------|
| O  | -0.10509100 | -0.38409100 | -1.29583400 |
| O  | 3.94939500  | -1.96053300 | -0.36510500 |
| C  | 4.39667800  | -2.94490700 | -2.91480800 |
| H  | 2.49383100  | -4.18817900 | 4.56682500  |
| H  | 2.62259300  | -2.63680000 | 5.43158200  |
| H  | 1.09757500  | -3.53693300 | 5.43754500  |
| H  | 5.25014200  | -2.26718100 | -3.03194400 |
| H  | 4.74455700  | -3.89519300 | -2.49684300 |
| H  | 4.00976500  | -3.15104600 | -3.91896500 |
| H  | 5.39748900  | 2.24296100  | 2.34434400  |
| H  | 5.65511900  | 3.24976700  | 0.89367800  |
| H  | 4.86000700  | 3.92290500  | 2.32249800  |
| Os | 3.39036200  | -0.98328900 | 1.09953300  |
| C  | 6.40558600  | -2.15778800 | 0.30172700  |
| C  | 6.43415700  | -0.76383800 | 0.70424600  |
| H  | 6.61714300  | -2.91965000 | 1.04780900  |
| H  | 6.11866300  | -2.47945600 | -0.69344000 |
| H  | 7.26299300  | -0.51028400 | 1.37453000  |
| C  | 6.25126300  | 0.26875700  | -0.37696000 |
| H  | 6.09232600  | 1.26190000  | 0.04826900  |
| H  | 7.16651700  | 0.30927800  | -0.97837500 |
| H  | 5.41431800  | 0.03706700  | -1.04462200 |

### IM1<sub>A</sub>

|    |             |             |             |
|----|-------------|-------------|-------------|
| W  | -3.13287700 | 0.67282300  | 1.66414100  |
| W  | -0.16503100 | 2.73699400  | 2.45888400  |
| W  | -0.42053400 | -0.82694100 | 3.43286100  |
| Si | 2.40113200  | -2.35123200 | 2.57536400  |
| P  | 0.30296700  | 0.05159800  | 0.03122300  |
| O  | -4.59525200 | 1.09424800  | 2.40905000  |
| O  | -0.45631100 | 3.79727400  | 3.75099600  |
| O  | -0.50880100 | -1.10634200 | 5.10669800  |
| O  | -3.24043800 | 1.49523500  | -0.05570300 |
| O  | -1.92230900 | 2.09453700  | 2.09946700  |
| O  | -2.21693700 | -0.33797500 | 3.03452000  |
| O  | 0.05686200  | 1.02398100  | 3.30707200  |
| O  | -0.65888800 | -2.64124000 | 2.74899900  |
| O  | 1.80269000  | 2.93078800  | 2.35165300  |
| O  | 1.52151100  | -1.10540800 | 3.10730900  |
| O  | -0.53609400 | -0.77281600 | 1.00663600  |
| O  | 1.77936200  | -0.70646300 | 0.03105700  |
| O  | 3.74323300  | -1.54242600 | 1.68670800  |
| O  | 5.71575600  | 0.04181800  | 0.76397000  |
| C  | 3.34553500  | -3.30366300 | 3.83822800  |



|    |             |             |             |
|----|-------------|-------------|-------------|
| W  | -3.02765600 | -1.93182700 | -0.85826800 |
| W  | -0.31654100 | -3.42485900 | 1.03095000  |
| W  | 0.12396200  | -2.51971200 | -2.56416100 |
| Si | 3.06060100  | -1.03334100 | -2.74806900 |
| O  | -4.41482700 | -2.82270000 | -1.25181500 |
| O  | -0.44368500 | -5.09543500 | 1.30168500  |
| O  | 0.16216400  | -3.86410700 | -3.59865300 |
| O  | -3.52877500 | -0.92985100 | 0.69065600  |
| O  | -2.05618200 | -3.07802500 | 0.33555400  |
| O  | -1.73652100 | -2.43556200 | -2.19919900 |
| O  | 0.26659700  | -3.21096900 | -0.77600300 |
| O  | 0.17179400  | -1.02516400 | -3.75772600 |
| O  | 1.61384700  | -3.21778000 | 1.46924300  |
| O  | 2.09130800  | -2.25881500 | -2.36552100 |
| O  | -0.22635600 | -0.15082200 | -1.38733800 |
| O  | 4.12315900  | -0.78552800 | -1.31090600 |
| C  | 4.32812400  | -1.38179600 | -4.04239100 |
| W  | -2.69033600 | 1.53164100  | -1.88591200 |
| W  | 0.45006300  | 0.89337100  | -3.45136900 |
| W  | 0.24002800  | 3.58099900  | -0.91660700 |
| Si | 2.79412200  | 3.10455700  | 1.08939500  |
| O  | -3.96540600 | 2.32356400  | -2.67244200 |
| O  | 0.77241500  | 1.41761900  | -5.03535600 |
| O  | 0.18935700  | 5.13330300  | -1.59909000 |
| O  | -3.20498300 | -0.30414100 | -1.86543600 |
| O  | -1.41816800 | 1.23092600  | -3.31240600 |
| O  | -1.50023000 | 2.93418900  | -1.32038300 |
| O  | 0.76922500  | 2.44625800  | -2.38900300 |
| O  | -0.24892600 | 3.90081800  | 0.91971800  |
| O  | 2.27792800  | 0.37472600  | -2.85224700 |
| O  | 2.12022100  | 3.58860900  | -0.29567300 |
| O  | 0.52968100  | 1.50238400  | 0.42995800  |
| O  | 3.43165700  | 1.45838300  | 0.74533200  |
| C  | 4.37948800  | 3.96114800  | 1.48194000  |
| H  | 5.02813300  | -0.54843200 | -4.15826200 |
| H  | 4.89258800  | -2.29056800 | -3.81191700 |
| H  | 3.83039500  | -1.53468500 | -5.00611400 |
| H  | 4.18543300  | 5.00610700  | 1.74502900  |
| H  | 4.88635900  | 3.48911000  | 2.32915100  |
| H  | 5.05033700  | 3.95475500  | 0.61682400  |
| H  | 3.97350000  | -2.64431900 | 4.44487000  |
| H  | 2.64523300  | -3.81201100 | 4.50982800  |
| H  | 3.97752300  | -4.06621500 | 3.37326000  |
| Os | 3.58616300  | -0.29201800 | 0.36749700  |

|   |            |             |             |
|---|------------|-------------|-------------|
| C | 6.74058800 | -0.89971600 | 0.28011700  |
| C | 6.64740700 | 0.44712800  | -0.27695300 |
| H | 6.29306400 | -1.69296700 | -0.32089900 |
| H | 7.32007800 | 1.22896500  | 0.07033200  |
| H | 6.18540900 | 0.59306600  | -1.25203600 |
| C | 7.73888600 | -1.29828300 | 1.30894700  |
| H | 8.09347000 | -0.43310400 | 1.87661100  |
| H | 7.30729900 | -2.02354500 | 2.00613400  |
| H | 8.59843700 | -1.77127300 | 0.82181100  |

**IM1<sub>B</sub>**

|    |             |             |             |
|----|-------------|-------------|-------------|
| W  | -3.01912100 | 1.96938300  | 0.33317500  |
| W  | 0.26089300  | 3.49075300  | 1.11953400  |
| W  | -1.26929400 | 0.86809600  | 3.22892400  |
| Si | 1.02886000  | -1.44363900 | 3.84722200  |
| P  | 0.25999100  | -0.01942100 | 0.11823500  |
| O  | -4.36546800 | 2.99521900  | 0.39563900  |
| O  | 0.11250400  | 5.05323600  | 1.76422800  |
| O  | -1.71187200 | 1.36307700  | 4.79286600  |
| O  | -2.54787100 | 1.93919000  | -1.51460300 |
| O  | -1.51293000 | 3.14829500  | 0.52927100  |
| O  | -2.73276500 | 1.51119400  | 2.19073300  |
| O  | -0.22950600 | 2.34027900  | 2.57867000  |
| O  | -1.93817400 | -0.96559200 | 3.23552700  |
| O  | 2.17109400  | 3.18015500  | 1.53065100  |
| O  | 0.52013500  | 0.06386400  | 3.56116200  |
| O  | -0.97494900 | -0.08044800 | 1.01745900  |
| O  | 1.35439000  | -1.02430300 | 0.86350400  |
| O  | 2.69610400  | -1.42228100 | 3.14940400  |
| O  | 5.22523100  | -0.84651300 | 2.16994400  |
| C  | 1.38917900  | -1.89595200 | 5.59545200  |
| W  | -3.32896400 | -1.41774200 | -0.89094800 |
| W  | -1.58307800 | -2.48305500 | 2.11420900  |
| W  | -0.29758600 | -3.39639500 | -1.26880600 |
| Si | 2.94479700  | -2.85016800 | -1.13228600 |
| O  | -4.83161100 | -2.08327900 | -1.30280600 |
| O  | -2.28734100 | -3.78931000 | 2.93591000  |
| O  | -0.54862400 | -5.02541400 | -1.67192700 |
| O  | -3.76422500 | 0.24176600  | -0.04587400 |
| O  | -2.97078300 | -2.09269400 | 0.87005900  |
| O  | -2.05101400 | -2.72747200 | -1.50976700 |
| O  | -0.66463900 | -3.22214000 | 0.61149000  |
| O  | 0.44248300  | -2.61696200 | -2.85251100 |
| O  | 0.20356800  | -2.53073300 | 2.98907200  |

|                  |             |             |             |
|------------------|-------------|-------------|-------------|
| O                | 1.58671600  | -3.55997600 | -0.64869200 |
| O                | -0.05671700 | -0.70639600 | -1.20931100 |
| O                | 3.73052300  | -2.26375900 | 0.37043000  |
| C                | 4.25689800  | -3.96600000 | -1.79386100 |
| W                | -1.71078900 | 1.04991500  | -2.98632700 |
| W                | 1.27322200  | -0.87576800 | -3.20581600 |
| W                | 1.50974300  | 2.63180000  | -2.04102200 |
| Si               | 3.36406500  | 2.54810000  | 0.64758900  |
| O                | -2.49711000 | 1.68909700  | -4.34404300 |
| O                | 2.03128100  | -1.19234600 | -4.69412300 |
| O                | 2.06140800  | 3.68673000  | -3.25016700 |
| O                | -2.80828700 | -0.41663700 | -2.44240300 |
| O                | -0.38301400 | -0.11880400 | -3.76817600 |
| O                | -0.24909100 | 2.25086900  | -2.64923600 |
| O                | 1.89116900  | 0.87134600  | -2.75486400 |
| O                | 0.83351500  | 3.82972300  | -0.70005200 |
| O                | 2.69673300  | -1.47020100 | -1.93723100 |
| O                | 3.17106800  | 2.53040900  | -0.95684900 |
| O                | 0.90292100  | 1.35580700  | -0.00345600 |
| O                | 3.44831700  | 0.81458100  | 1.08467500  |
| C                | 5.02706200  | 3.13009000  | 1.20448400  |
| H                | 3.92989500  | -4.38758800 | -2.75060100 |
| H                | 5.19432100  | -3.42917400 | -1.97404200 |
| H                | 4.45213300  | -4.80044900 | -1.11306600 |
| H                | 5.05175600  | 4.22463800  | 1.17408300  |
| H                | 5.22486800  | 2.82614400  | 2.23780700  |
| H                | 5.83629000  | 2.76634500  | 0.56349500  |
| H                | 0.45672200  | -1.90089400 | 6.17031400  |
| H                | 1.83213300  | -2.89401200 | 5.66347200  |
| H                | 2.06903400  | -1.17552100 | 6.05961900  |
| Os               | 3.14470000  | -0.91764600 | 1.45985700  |
| C                | 6.22907200  | -1.86545300 | 1.92159500  |
| C                | 6.39813200  | -0.54423900 | 1.32011000  |
| H                | 5.87440300  | -2.67931900 | 1.28899400  |
| H                | 6.76105800  | -2.14497800 | 2.82776600  |
| H                | 7.03125100  | 0.16393000  | 1.85446000  |
| C                | 6.19641900  | -0.28915700 | -0.13616300 |
| H                | 7.17918000  | -0.26208500 | -0.62006800 |
| H                | 5.60461400  | -1.07057100 | -0.61924100 |
| H                | 5.71438000  | 0.67545800  | -0.32298500 |
| <b>IM2 (s=1)</b> |             |             |             |
| W                | -2.92354300 | 0.01452300  | -1.95578800 |
| W                | -0.16990200 | -2.37036400 | -2.69225100 |

|    |             |             |             |
|----|-------------|-------------|-------------|
| W  | 0.14322900  | 1.25688600  | -3.41009800 |
| Si | 3.07212000  | 2.21067200  | -2.17815000 |
| P  | 0.30617000  | -0.08723300 | 0.02928500  |
| O  | -4.33190200 | -0.06546200 | -2.89504200 |
| O  | -0.42545200 | -3.23177100 | -4.13120700 |
| O  | 0.11558900  | 1.64677500  | -5.06174600 |
| O  | -3.38214900 | -0.95011500 | -0.38926200 |
| O  | -1.84254000 | -1.50624200 | -2.44290600 |
| O  | -1.69990300 | 0.99193500  | -3.10971500 |
| O  | 0.41855200  | -0.63602200 | -3.32113000 |
| O  | 0.13739700  | 2.99796500  | -2.50776300 |
| O  | 1.73550300  | -2.88230700 | -2.35360700 |
| O  | 2.13849600  | 1.37923800  | -3.17641200 |
| O  | 0.00528200  | 0.98227200  | -1.00775800 |
| O  | 1.85671500  | 0.29206800  | 0.60693400  |
| O  | 3.90907700  | 0.72406500  | -1.32012500 |
| C  | 4.55481900  | 3.05514900  | -2.85125700 |
| W  | -2.67523000 | 2.27144600  | -0.90386300 |
| W  | 0.40101800  | 3.42910800  | -0.65546700 |
| W  | 0.36439500  | 2.20282800  | 2.88958100  |
| Si | 2.96163200  | 0.14557800  | 3.08271300  |
| O  | -3.92359600 | 3.37051900  | 1.21927000  |
| O  | 0.64122100  | 5.10780000  | -0.71108300 |
| O  | 0.46289000  | 3.44813600  | 4.03441100  |
| O  | -3.09722200 | 1.53792700  | -0.83869000 |
| O  | -1.39001100 | 3.33228700  | -0.12333300 |
| O  | -1.48244500 | 2.47198300  | 2.35589900  |
| O  | 0.79088400  | 2.92007700  | 1.18487100  |
| O  | -0.09706900 | 0.60160300  | 3.84850100  |
| O  | 2.31637300  | 2.84708100  | -0.91814900 |
| O  | 2.22486600  | 1.59374100  | 3.00775700  |
| O  | -0.51172400 | 0.08885300  | 1.30239800  |
| O  | 4.00823100  | -0.11645600 | 1.67746200  |
| C  | 4.19709600  | 0.00531200  | 4.44260000  |
| W  | -3.06384900 | -1.26335300 | 1.48183200  |
| W  | -0.06683800 | -1.28564100 | 3.40713700  |
| W  | -0.39424800 | -3.64801700 | 0.56255800  |
| Si | 2.46163000  | -3.57105700 | -1.08641200 |
| O  | -4.52264200 | -1.92926500 | 2.02495200  |
| O  | -0.01915900 | -2.00498000 | 4.94229100  |
| O  | -0.78905500 | -5.22657700 | 1.03896500  |
| O  | -3.31919500 | 0.63256500  | 1.64608400  |
| O  | -1.95047400 | -1.32488300 | 3.03969700  |
| O  | -2.05071400 | -2.76692300 | 0.82837700  |

|    |             |             |             |
|----|-------------|-------------|-------------|
| O  | 0.10912000  | -2.75869300 | 2.18890900  |
| O  | -0.63319700 | -3.68412700 | -1.35656500 |
| O  | 1.84240200  | -1.03651100 | 3.02867500  |
| O  | 1.53506000  | -3.94578700 | 0.17096000  |
| O  | 0.40462300  | -1.51090100 | -0.48904200 |
| O  | 3.48877300  | -2.16624600 | -0.38766900 |
| C  | 3.81177900  | -4.75200100 | -1.48029300 |
| H  | 4.70008800  | -0.96609500 | 4.42394100  |
| H  | 4.95625200  | 0.78963300  | 4.36904200  |
| H  | 3.69435900  | 0.10991800  | 5.40994000  |
| H  | 3.38811900  | -5.67697300 | -1.88507700 |
| H  | 4.49502200  | -4.33998200 | -2.22834400 |
| H  | 4.38008000  | -5.00821900 | -0.58128200 |
| H  | 5.10174500  | 2.39561500  | -3.53140300 |
| H  | 4.25804700  | 3.94773100  | -3.41137800 |
| H  | 5.22296800  | 3.37010800  | -2.04429200 |
| Os | 3.43456200  | -0.42363800 | -0.07687300 |

**IM2 (s=3)**

|    |             |             |             |
|----|-------------|-------------|-------------|
| W  | -2.88992500 | 0.06676600  | -1.99048300 |
| W  | -0.23114600 | -2.41173300 | -2.72963200 |
| W  | 0.19597000  | 1.21575900  | -3.33153000 |
| Si | 3.12990400  | 2.09069800  | -2.00065900 |
| P  | 0.26831100  | -0.11936200 | 0.02296500  |
| O  | -4.31056700 | -0.03920700 | -2.90562400 |
| O  | -0.54080000 | -3.27714100 | -4.15429100 |
| O  | 0.34935300  | 1.67779500  | -4.95736700 |
| O  | -3.31224400 | -0.89815400 | -0.39411100 |
| O  | -1.87558300 | -1.50229600 | -2.45525200 |
| O  | -1.69222200 | 1.01774900  | -3.17455900 |
| O  | 0.35624800  | -0.68957100 | -3.36501600 |
| O  | 0.19218000  | 2.95151200  | -2.43235600 |
| O  | 1.66162500  | -2.93526200 | -2.43921200 |
| O  | 2.10808100  | 1.12034200  | -2.78904400 |
| O  | -0.28027300 | 0.89562400  | -0.96819200 |
| O  | 1.84024100  | 0.45986100  | 0.30441000  |
| O  | 4.11891300  | 0.86959800  | -1.07758300 |
| C  | 4.45071600  | 2.93006600  | -2.96614600 |
| W  | -2.66185100 | 2.30295400  | 0.85032800  |
| W  | 0.45993200  | 3.48236800  | -0.61058100 |
| W  | 0.34286700  | 2.18034400  | 2.88911300  |
| Si | 2.92813500  | 0.13215300  | 3.17633100  |
| O  | -3.90234000 | 3.39714400  | 1.20885500  |
| O  | 0.64314600  | 5.16505700  | -0.69197800 |

|    |             |             |             |
|----|-------------|-------------|-------------|
| O  | 0.48976700  | 3.38472200  | 4.07298800  |
| O  | -3.14628300 | 1.59542900  | -0.86933800 |
| O  | -1.36452200 | 3.36109600  | -0.11531800 |
| O  | -1.45615900 | 2.45883400  | 2.34828000  |
| O  | 0.80508400  | 2.98521400  | 1.21581800  |
| O  | -0.02339400 | 0.57371700  | 3.87334800  |
| O  | 2.37090300  | 2.97000000  | -0.88309100 |
| O  | 2.24109800  | 1.55965000  | 2.88353700  |
| O  | -0.40443600 | 0.03922400  | 1.37864700  |
| O  | 4.03183500  | -0.17058600 | 1.76139100  |
| C  | 4.11912100  | 0.04257700  | 4.57375100  |
| W  | -3.02547600 | -1.24237300 | 1.45824700  |
| W  | -0.05581200 | -1.31782400 | 3.40137200  |
| W  | -0.36432300 | -3.65649400 | 0.54863400  |
| Si | 2.45619500  | -3.51755100 | -1.15991800 |
| O  | -4.49923300 | -1.88943100 | 1.98336500  |
| O  | 0.01651700  | -2.03415800 | 4.93864200  |
| O  | -0.74661300 | -5.23894900 | 1.02177900  |
| O  | -3.25019800 | 0.65819900  | 1.63073200  |
| O  | -1.92551800 | -1.32291300 | 3.05108200  |
| O  | -2.01754800 | -2.76026300 | 0.84073700  |
| O  | 0.13405700  | -2.79081600 | 2.19601400  |
| O  | -0.66901100 | -3.69503200 | -1.35560200 |
| O  | 1.87721800  | -1.07986600 | 2.98356300  |
| O  | 1.56061300  | -3.92002900 | 0.11949100  |
| O  | 0.43557400  | -1.53715300 | -0.48449000 |
| O  | 3.45634000  | -2.07567600 | -0.56549500 |
| C  | 3.83188900  | -4.67097100 | -1.55425700 |
| H  | 4.62908600  | -0.92508600 | 4.59310800  |
| H  | 4.86938900  | 0.83541700  | 4.50231400  |
| H  | 3.58592100  | 0.16490900  | 5.52259900  |
| H  | 3.42251300  | -5.60677100 | -1.94897200 |
| H  | 4.49691300  | -4.24875400 | -2.31311900 |
| H  | 4.41706500  | -4.90981500 | -0.66161200 |
| H  | 5.00530100  | 2.21347900  | -3.57909000 |
| H  | 4.00516900  | 3.67553100  | -3.63321400 |
| H  | 5.15252900  | 3.44508100  | -2.30363700 |
| Os | 3.47388000  | -0.40007900 | 0.04866500  |

**AD2 (s=1)**

|    |             |             |             |
|----|-------------|-------------|-------------|
| W  | 3.07964600  | -1.44043400 | -1.41932200 |
| W  | 0.18423800  | -0.70677300 | -3.62265600 |
| W  | 0.08879900  | -3.39484700 | -1.08183300 |
| Si | -2.71388100 | -3.08497400 | 0.67581500  |

|    |             |             |             |
|----|-------------|-------------|-------------|
| P  | -0.28577000 | 0.00799800  | -0.04552500 |
| O  | 4.47034100  | -2.06105000 | -2.16084600 |
| O  | 0.45755500  | -1.29362900 | -5.18907100 |
| O  | 0.00410700  | -4.96616400 | -1.71951200 |
| O  | 3.44965600  | 0.43071800  | -1.25888000 |
| O  | 1.90484400  | -0.91668800 | -2.84347400 |
| O  | 1.93622900  | -2.99936500 | -1.27385700 |
| O  | -0.25738500 | -2.27198700 | -2.59749600 |
| O  | 0.27405200  | -3.78994800 | 0.83009300  |
| O  | -1.74191900 | -0.27647700 | -3.79930300 |
| O  | -1.83179200 | -3.05151400 | -0.67276700 |
| O  | 0.38029500  | -1.34793500 | 0.15297000  |
| O  | -1.82966000 | -0.13057400 | 0.58859500  |
| O  | -3.88192500 | -1.72556300 | 0.44187800  |
| O  | -5.52785700 | -0.13351600 | -0.40249500 |
| C  | -3.90650000 | -4.47328000 | 0.88299400  |
| W  | 3.04098900  | -0.60314300 | 2.11678700  |
| W  | 0.08274300  | -2.68332500 | 2.38063100  |
| W  | 0.03719400  | 0.87885700  | 3.49800100  |
| Si | -2.76618200 | 2.19709500  | 2.35222900  |
| O  | 4.40577500  | -0.88581300 | 3.07898400  |
| O  | 0.06872300  | -3.79149400 | 3.66416600  |
| O  | 0.01682700  | 1.06388200  | 5.18398900  |
| O  | 3.43601700  | -1.47896000 | 0.45000000  |
| O  | 1.89179000  | -2.10844900 | 2.45474900  |
| O  | 1.86920300  | 0.41686200  | 3.24113600  |
| O  | -0.31029000 | -0.96486500 | 3.15353600  |
| O  | 0.20511400  | 2.67150100  | 2.83684800  |
| O  | -1.86716800 | -2.67714300 | 1.98135500  |
| O  | -1.92241700 | 1.10016500  | 3.17576800  |
| O  | 0.35498800  | 1.03089600  | 0.88935400  |
| O  | -3.93394000 | 1.18936500  | 1.38748500  |
| C  | -3.92633500 | 3.24728200  | 3.31677500  |
| W  | 3.03972000  | 2.06363100  | -0.35243900 |
| W  | 0.02180900  | 3.42757400  | 1.04107800  |
| W  | 0.12905300  | 2.64302000  | -2.57938700 |
| Si | -2.60714400 | 0.98257000  | -3.28052200 |
| O  | 4.41189000  | 3.02373600  | -0.60722200 |
| O  | -0.07507700 | 5.08536800  | 1.39453400  |
| O  | 0.35406100  | 4.02382100  | -3.53553700 |
| O  | 3.41603000  | 1.04625400  | 1.22093300  |
| O  | 1.87315300  | 3.22807200  | 0.66741500  |
| O  | 1.86269100  | 2.42767700  | -1.81508300 |
| O  | -0.32270000 | 3.33965500  | -0.84088700 |

|    |             |             |             |
|----|-------------|-------------|-------------|
| O  | 0.47629200  | 1.19718900  | -3.80071400 |
| O  | -1.89706900 | 2.90521100  | 1.19208900  |
| O  | -1.79263700 | 2.33149400  | -2.94068000 |
| O  | -0.42944000 | 0.45131900  | -1.49492800 |
| O  | -3.15267200 | 0.38681100  | -1.65238600 |
| C  | -4.21376400 | 1.23014700  | -4.14062700 |
| H  | -3.35436700 | 3.93060600  | 3.95377600  |
| H  | -4.55740000 | 3.84697200  | 2.65446200  |
| H  | -4.56639000 | 2.63832300  | 3.96144300  |
| H  | -4.02916000 | 1.47059200  | -5.19308700 |
| H  | -4.82659400 | 0.32462100  | -4.10523200 |
| H  | -4.77368200 | 2.05697400  | -3.69451600 |
| H  | -3.35421100 | -5.40706100 | 1.03373700  |
| H  | -4.54546900 | -4.30888800 | 1.75538800  |
| H  | -4.53749400 | -4.58552900 | -0.00318100 |
| Os | -3.61831300 | 0.02750600  | 0.03393400  |
| O  | -5.41358600 | 1.13345200  | -0.71335200 |

**AD2 (s=3)**

|    |             |             |             |
|----|-------------|-------------|-------------|
| W  | 3.07643800  | -1.44155900 | -1.41972600 |
| W  | 0.18675600  | -0.69854000 | -3.63193700 |
| W  | 0.06876000  | -3.38089600 | -1.08136700 |
| Si | -2.72147200 | -3.08287000 | 0.69385000  |
| P  | -0.28266900 | 0.02812400  | -0.04841100 |
| O  | 4.46223900  | -2.07297900 | -2.16209800 |
| O  | 0.47236200  | -1.29208400 | -5.19350000 |
| O  | -0.01829900 | -4.95171700 | -1.72026700 |
| O  | 3.45216900  | 0.42822300  | -1.26427100 |
| O  | 1.90052400  | -0.91494900 | -2.84153400 |
| O  | 1.91768800  | -2.98979300 | -1.26790100 |
| O  | -0.27213100 | -2.25562900 | -2.59473100 |
| O  | 0.25465500  | -3.77647700 | 0.83138800  |
| O  | -1.73207000 | -0.26471600 | -3.82880500 |
| O  | -1.85300300 | -3.03904600 | -0.66375100 |
| O  | 0.35876000  | -1.33762300 | 0.15684000  |
| O  | -1.83359900 | -0.13742800 | 0.61951600  |
| O  | -3.90019600 | -1.71940700 | 0.45133600  |
| O  | -5.64693600 | -0.22246100 | -0.80837300 |
| C  | -3.90702200 | -4.47426300 | 0.91091200  |
| W  | 3.04542700  | -0.60086700 | 2.11666300  |
| W  | 0.08089800  | -2.67138200 | 2.38652500  |
| W  | 0.04987500  | 0.89012500  | 3.51431900  |
| Si | -2.75650300 | 2.18430400  | 2.35678800  |
| O  | 4.41233000  | -0.88892500 | 3.07467900  |



|    |             |             |             |
|----|-------------|-------------|-------------|
| O  | 0.06512100  | -3.78426800 | 3.66629600  |
| O  | 0.04715700  | 1.07493800  | 5.20031500  |
| O  | 3.43231800  | -1.47957200 | 0.44694200  |
| O  | 1.89249300  | -2.10755300 | 2.44867400  |
| O  | 1.88154500  | 0.41615000  | 3.24306000  |
| O  | -0.29895900 | -0.95729700 | 3.16888900  |
| O  | 0.23414000  | 2.67603000  | 2.84512800  |
| O  | -1.87464100 | -2.65344000 | 1.99180900  |
| O  | -1.89963200 | 1.11213700  | 3.20122200  |
| O  | 0.36080600  | 1.03958800  | 0.89184700  |
| O  | -3.91321800 | 1.20685800  | 1.37868200  |
| C  | -3.91430800 | 3.24003200  | 3.32098900  |
| W  | 3.04637400  | 2.06386700  | -0.35816200 |
| W  | 0.03700300  | 3.43121600  | 1.04895200  |
| W  | 0.12869700  | 2.64786400  | -2.57567900 |
| Si | -2.60355500 | 0.97568500  | -3.27216700 |
| O  | 4.42060100  | 3.02034300  | -0.61626200 |
| O  | -0.05919200 | 5.08924400  | 1.40219700  |
| O  | 0.34942500  | 4.03067800  | -3.53022500 |
| O  | 3.42288000  | 1.04466300  | 1.21540000  |
| O  | 1.88696700  | 3.23129300  | 0.66546200  |
| O  | 1.86687100  | 2.43039000  | -1.81671200 |
| O  | -0.31401900 | 3.34384900  | -0.83468600 |
| O  | 0.48243400  | 1.20446800  | -3.80131600 |
| O  | -1.87453400 | 2.90288800  | 1.20903500  |
| O  | -1.79159300 | 2.32949300  | -2.93354100 |
| O  | -0.42923900 | 0.46681400  | -1.49499200 |
| O  | -3.13191600 | 0.33989900  | -1.68118800 |
| C  | -4.21655600 | 1.23480200  | -4.12190700 |
| H  | -3.33976800 | 3.91704700  | 3.96242000  |
| H  | -4.54137200 | 3.84721900  | 2.66181600  |
| H  | -4.55954500 | 2.63354100  | 3.96312000  |
| H  | -4.04314400 | 1.54520700  | -5.15783700 |
| H  | -4.80470200 | 0.31208700  | -4.14325500 |
| H  | -4.80085700 | 2.01924800  | -3.63113000 |
| H  | -3.35086700 | -5.40582100 | 1.06181500  |
| H  | -4.54232100 | -4.31224100 | 1.78655500  |
| H  | -4.54196500 | -4.59471300 | 0.02854000  |
| Os | -3.59368600 | 0.01876300  | 0.03232800  |
| O  | -5.47659000 | 1.02926800  | -0.65246800 |

**AD2 (s=5)**

|   |            |             |             |
|---|------------|-------------|-------------|
| W | 3.06469700 | -1.46287400 | -1.41035200 |
| W | 0.15643800 | -0.70447600 | -3.58819200 |

|    |             |             |             |
|----|-------------|-------------|-------------|
| W  | 0.09600800  | -3.40858000 | -1.06518200 |
| Si | -2.70870100 | -3.11784000 | 0.70811700  |
| P  | -0.15255100 | 0.02946400  | -0.04251800 |
| O  | 4.45685200  | -2.05691000 | -2.16996300 |
| O  | 0.37932200  | -1.28082100 | -5.16711100 |
| O  | -0.01522100 | -4.98547000 | -1.68493900 |
| O  | 3.40745300  | 0.41251500  | -1.24800300 |
| O  | 1.88348400  | -0.93716500 | -2.84015600 |
| O  | 1.95116000  | -3.04133900 | -1.27770700 |
| O  | -0.25972300 | -2.29411400 | -2.57302900 |
| O  | 0.28898900  | -3.77421700 | 0.85090600  |
| O  | -1.78254900 | -0.29346100 | -3.67120200 |
| O  | -1.81091100 | -3.02911300 | -0.63202700 |
| O  | 0.52878600  | -1.32168400 | 0.12917100  |
| O  | -1.67155900 | -0.21897700 | 0.66275300  |
| O  | -3.87680300 | -1.74967100 | 0.45539500  |
| O  | -5.96801600 | 0.10238600  | -0.38619200 |
| C  | -3.86904400 | -4.53423800 | 0.88373100  |
| W  | 3.06497300  | -0.62019200 | 2.11452400  |
| W  | 0.09313200  | -2.68044800 | 2.40835500  |
| W  | 0.07657400  | 0.89637600  | 3.50567500  |
| Si | -2.73124600 | 2.20004200  | 2.33743800  |
| O  | 4.42864700  | -0.90391600 | 3.07792600  |
| O  | 0.08980700  | -3.77911900 | 3.69976200  |
| O  | 0.05826400  | 1.07478100  | 5.19192700  |
| O  | 3.47019800  | -1.49961400 | 0.45249700  |
| O  | 1.90931700  | -2.11504500 | 2.46802200  |
| O  | 1.89744400  | 0.40593100  | 3.24763000  |
| O  | -0.28976400 | -0.95159000 | 3.14393300  |
| O  | 0.26266900  | 2.68435100  | 2.84706300  |
| O  | -1.86192300 | -2.70677600 | 2.01533100  |
| O  | -1.87774400 | 1.12108200  | 3.17564000  |
| O  | 0.47936500  | 1.06354200  | 0.87837200  |
| O  | -3.87750300 | 1.20637000  | 1.33770900  |
| C  | -3.90941200 | 3.24710300  | 3.28585700  |
| W  | 3.04854600  | 2.05643700  | -0.34086400 |
| W  | 0.07465200  | 3.45755300  | 1.05744500  |
| W  | 0.13236700  | 2.64502800  | -2.55490100 |
| Si | -2.63976600 | 0.99405600  | -3.21266000 |
| O  | 4.43844600  | 2.98264400  | -0.62305000 |
| O  | -0.02782500 | 5.11219500  | 1.42379000  |
| O  | 0.33560100  | 4.01489100  | -3.53250400 |
| O  | 3.44453500  | 1.03604200  | 1.22580700  |
| O  | 1.92748800  | 3.26788700  | 0.67280700  |

|    |             |             |             |
|----|-------------|-------------|-------------|
| O  | 1.87141200  | 2.43404300  | -1.81239100 |
| O  | -0.28102900 | 3.37710000  | -0.81925900 |
| O  | 0.44331000  | 1.19448600  | -3.78731700 |
| O  | -1.83646300 | 2.91879500  | 1.20174000  |
| O  | -1.80151700 | 2.32689600  | -2.85739500 |
| O  | -0.40551200 | 0.47023100  | -1.47021600 |
| O  | -3.41941200 | 0.49637800  | -1.63519700 |
| C  | -4.17339700 | 1.28928400  | -4.18807100 |
| H  | -3.34817600 | 3.93324100  | 3.92935500  |
| H  | -4.53593200 | 3.84617800  | 2.61866000  |
| H  | -4.55474200 | 2.63742100  | 3.92476300  |
| H  | -3.91286900 | 1.59586700  | -5.20644300 |
| H  | -4.77854000 | 0.37999300  | -4.25720000 |
| H  | -4.77720000 | 2.08579700  | -3.74200800 |
| H  | -3.30109600 | -5.46281700 | 1.00532000  |
| H  | -4.50681000 | -4.41081600 | 1.76400300  |
| H  | -4.50439900 | -4.63864300 | -0.00060200 |
| Os | -3.42885600 | -0.02779000 | 0.08151000  |
| O  | -6.41009100 | 0.90915800  | -1.18017100 |

**AD3 (s=1)**

|    |             |             |             |
|----|-------------|-------------|-------------|
| W  | 3.14876400  | -1.68821400 | 0.99165800  |
| W  | -0.04527000 | -3.56400100 | 0.95339100  |
| W  | 0.63803400  | -0.90476300 | 3.43726200  |
| Si | -1.97968100 | 1.14793700  | 3.52010000  |
| P  | -0.27127900 | 0.02786200  | 0.10765200  |
| O  | 4.54991800  | -2.55547900 | 1.38830800  |
| O  | 0.16222600  | -5.12738500 | 1.57805500  |
| O  | 0.79241000  | -1.46787000 | 5.03255500  |
| O  | 3.17014700  | -1.65021800 | -0.92560700 |
| O  | 1.76175700  | -2.99414500 | 0.78925300  |
| O  | 2.34719200  | -1.33619100 | 2.71743700  |
| O  | -0.06487300 | -2.42555600 | 2.49916100  |
| O  | 1.11070700  | 0.98326300  | 3.67898500  |
| O  | -2.02706500 | -3.53921700 | 0.91181900  |
| O  | -1.25033300 | -0.29170800 | 3.44044800  |
| O  | 0.65855200  | 0.19777900  | 1.30754900  |
| O  | -1.67063400 | 0.81299500  | 0.49744700  |
| O  | -3.41044100 | 0.98919200  | 2.45745100  |
| O  | -5.40875800 | 0.28213400  | 1.19748300  |
| C  | -2.82367500 | 1.55673800  | 5.10841000  |
| W  | 3.33052800  | 1.78995800  | -0.05255500 |
| W  | 0.86740500  | 2.49011200  | 2.52346500  |
| W  | 0.27008000  | 3.45297100  | -1.03248800 |

|    |             |             |             |
|----|-------------|-------------|-------------|
| Si | -2.84178300 | 2.57492800  | -1.71616900 |
| O  | 4.82108600  | 2.59519100  | -0.08155700 |
| O  | 1.21067300  | 3.81623200  | 3.52492800  |
| O  | 0.38509400  | 5.12239700  | -1.31748100 |
| O  | 3.70832800  | 0.12401400  | 0.83109700  |
| O  | 2.53230200  | 2.32334500  | 1.61038200  |
| O  | 2.11726500  | 3.00550500  | -0.91290600 |
| O  | 0.25153200  | 3.23700100  | 0.85784600  |
| O  | 0.02025000  | 2.70620900  | -2.78982900 |
| O  | -1.06940300 | 2.32575000  | 2.90181200  |
| O  | -1.71205500 | 3.33702500  | -0.85991100 |
| O  | 0.28272100  | 0.83536800  | -1.06860200 |
| O  | -3.89500600 | 1.79982900  | -0.46783600 |
| C  | -4.06792500 | 3.64235400  | -2.58060900 |
| W  | 2.55465500  | -0.77502300 | -2.50447400 |
| W  | -0.49353700 | 0.91984600  | -3.37194000 |
| W  | -0.64085600 | -2.64759900 | -2.37776600 |
| Si | -3.05449200 | -2.95956100 | -0.18576700 |
| O  | 3.68029200  | -1.23757500 | -3.68387200 |
| O  | -0.86811500 | 1.19814900  | -5.00573700 |
| O  | -0.80508500 | -3.68319600 | -3.71117900 |
| O  | 3.28866100  | 0.78886100  | -1.68629800 |
| O  | 1.30167900  | 0.32107500  | -3.50172500 |
| O  | 1.17897800  | -2.10537300 | -2.54813900 |
| O  | -1.02421800 | -0.90590600 | -3.08701600 |
| O  | -0.14946500 | -3.85119700 | -0.95134100 |
| O  | -2.26120000 | 1.31146000  | -2.53332700 |
| O  | -2.49771500 | -2.77103700 | -1.68547000 |
| O  | -0.62823300 | -1.42059600 | -0.21588500 |
| O  | -3.31751700 | -1.28667600 | 0.43158700  |
| C  | -4.76195000 | -3.64593500 | -0.08675800 |
| H  | -4.49162200 | 4.38722100  | -1.90079300 |
| H  | -3.57641900 | 4.17485600  | -3.40176300 |
| H  | -4.88063500 | 3.04439100  | -3.00400000 |
| H  | -5.40773500 | -3.17267400 | -0.83249900 |
| H  | -4.74249200 | -4.72232100 | -0.28678300 |
| H  | -5.19240100 | -3.49499400 | 0.90803500  |
| H  | -2.07087500 | 1.68668000  | 5.89324200  |
| H  | -3.39087100 | 2.48812400  | 5.02264900  |
| H  | -3.50293500 | 0.75568600  | 5.41357900  |
| Os | -3.52389600 | 0.46529400  | 0.70422100  |
| O  | -5.64117700 | -0.12249000 | -0.04104900 |
| C  | -7.95153900 | -0.97901800 | -0.18328200 |
| C  | -8.22908500 | 0.34084600  | -0.31534200 |

|   |             |             |             |
|---|-------------|-------------|-------------|
| H | -7.87284500 | -1.44550400 | 0.79781200  |
| H | -7.82792800 | -1.62494500 | -1.04849800 |
| H | -8.30568400 | 0.75466800  | -1.32282700 |
| C | -8.41185400 | 1.28065300  | 0.80812900  |
| H | -7.68051200 | 2.09949000  | 0.74671800  |
| H | -9.39786800 | 1.76274700  | 0.75701300  |
| H | -8.31011100 | 0.79412300  | 1.78282100  |

**AD3 (s=3)**

|    |             |             |             |
|----|-------------|-------------|-------------|
| W  | 3.00590600  | -1.25246200 | -1.40161500 |
| W  | 0.11607200  | -0.63199100 | -3.63192900 |
| W  | 0.10290700  | -3.34380900 | -1.11032300 |
| Si | -2.73346100 | -3.19197500 | 0.60978500  |
| P  | -0.45605900 | 0.03118300  | -0.02375700 |
| O  | 4.43891400  | -1.79236700 | -2.12714800 |
| O  | 0.43532500  | -1.18081400 | -5.20392900 |
| O  | 0.10658300  | -4.91151900 | -1.76294000 |
| O  | 3.26386000  | 0.64275300  | -1.22386400 |
| O  | 1.83903400  | -0.77130000 | -2.84666800 |
| O  | 1.94190400  | -2.85571800 | -1.27331900 |
| O  | -0.25778800 | -2.22810000 | -2.62269700 |
| O  | 0.29937600  | -3.74980400 | 0.79637700  |
| O  | -1.83162900 | -0.32982400 | -3.82507800 |
| O  | -1.82403400 | -3.09720900 | -0.72303600 |
| O  | 0.27665800  | -1.29539100 | 0.16723800  |
| O  | -1.98627100 | -0.22553100 | 0.57668300  |
| O  | -3.98852200 | -1.93294800 | 0.36483900  |
| O  | -6.03875500 | -0.32149900 | 0.26236700  |
| C  | -3.79939100 | -4.68357800 | 0.78369500  |
| W  | 2.88828500  | -0.44843900 | 2.14314200  |
| W  | 0.02738200  | -2.66935200 | 2.35331800  |
| W  | -0.18794800 | 0.87153000  | 3.51814200  |
| Si | -3.04557300 | 2.04421700  | 2.35786600  |
| O  | 4.25901300  | -0.67470400 | 3.11262900  |
| O  | 0.05991400  | -3.79444200 | 3.62263400  |
| O  | -0.22918200 | 1.03563700  | 5.20632000  |
| O  | 3.34809800  | -1.27536900 | 0.46965900  |
| O  | 1.81304100  | -2.00833200 | 2.45184900  |
| O  | 1.66609000  | 0.50201700  | 3.27302300  |
| O  | -0.44136300 | -0.98717200 | 3.15742500  |
| O  | -0.09075100 | 2.68678300  | 2.88667800  |
| O  | -1.91311000 | -2.75618900 | 1.92906400  |
| O  | -2.13803000 | 0.99155700  | 3.17084200  |
| O  | 0.13459700  | 1.07448200  | 0.92233200  |

|    |             |             |             |
|----|-------------|-------------|-------------|
| O  | -4.13740100 | 1.06157400  | 1.34882800  |
| C  | -4.22839400 | 3.01137600  | 3.39352900  |
| W  | 2.77578500  | 2.23640100  | -0.30320600 |
| W  | -0.30208600 | 3.44963900  | 1.10546100  |
| W  | -0.16161900 | 2.68355300  | -2.51950300 |
| Si | -2.77888300 | 0.84069100  | -3.25199100 |
| O  | 4.10290300  | 3.26305800  | -0.54001000 |
| O  | -0.46515400 | 5.10429300  | 1.45582800  |
| O  | -0.03460000 | 4.09098800  | -3.45735100 |
| O  | 3.18671800  | 1.23284300  | 1.26615700  |
| O  | 1.54704800  | 3.34371800  | 0.71624200  |
| O  | 1.58352000  | 2.57522500  | -1.76763300 |
| O  | -0.67082000 | 3.33442600  | -0.78348500 |
| O  | 0.28681000  | 1.28468300  | -3.77250100 |
| O  | -2.20727100 | 2.88528100  | 1.26253800  |
| O  | -2.06980800 | 2.25316400  | -2.91753300 |
| O  | -0.56373000 | 0.47387100  | -1.47889600 |
| O  | -3.19891200 | 0.17984400  | -1.64247900 |
| C  | -4.41177700 | 0.95908600  | -4.10094900 |
| H  | -3.70227200 | 3.37154000  | 4.28461000  |
| H  | -4.61300800 | 3.88768200  | 2.86224500  |
| H  | -5.07235500 | 2.40081100  | 3.72931000  |
| H  | -4.28876300 | 1.40923500  | -5.09157400 |
| H  | -4.84198200 | -0.03810900 | -4.23736500 |
| H  | -5.12627400 | 1.56991600  | -3.54008400 |
| H  | -3.16665400 | -5.56941600 | 0.90643200  |
| H  | -4.44706400 | -4.60492700 | 1.66165100  |
| H  | -4.42327800 | -4.83216100 | -0.10252900 |
| Os | -3.79503300 | -0.14593200 | 0.00927300  |
| O  | -5.65684700 | 0.04166400  | -0.92275000 |
| C  | -5.90818600 | 2.80405300  | -0.90171700 |
| C  | -4.60218700 | 3.11662700  | -1.09219600 |
| H  | -6.52677500 | 2.59145900  | -1.77730500 |
| H  | -4.16498500 | 3.19726800  | -2.08526900 |
| H  | -3.92841600 | 3.34049600  | -0.26210000 |
| C  | -6.58521600 | 2.76246500  | 0.40835400  |
| H  | -7.54540500 | 3.29262100  | 0.37687200  |
| H  | -6.82951700 | 1.72256700  | 0.69199100  |
| H  | -5.96912100 | 3.18154900  | 1.20836000  |

**AD3 (s=5)**

|   |             |            |            |
|---|-------------|------------|------------|
| W | -2.81951900 | 1.50111000 | 1.61917400 |
| W | 0.36295000  | 3.34070500 | 1.23665300 |
| W | 0.01840200  | 0.42025000 | 3.49773500 |

|    |             |             |             |
|----|-------------|-------------|-------------|
| Si | 2.56157700  | -1.64846800 | 2.95622300  |
| P  | 0.23176800  | -0.06860000 | -0.05640000 |
| O  | -4.12956900 | 2.33123300  | 2.30172100  |
| O  | 0.36473000  | 4.82117800  | 2.06580600  |
| O  | 0.16171400  | 0.78897600  | 5.14942400  |
| O  | -3.08672400 | 1.65382500  | -0.26323300 |
| O  | -1.46811900 | 2.84608800  | 1.36788200  |
| O  | -1.78220500 | 0.94629100  | 3.15070100  |
| O  | 0.60116500  | 2.01954400  | 2.61716400  |
| O  | -0.44473800 | -1.47521700 | 3.57866800  |
| O  | 2.30266300  | 3.24350500  | 0.83414900  |
| O  | 1.86582600  | -0.19812300 | 3.10214200  |
| O  | -0.45864800 | -0.39336900 | 1.26503000  |
| O  | 1.63626000  | -0.97613400 | 0.00878800  |
| O  | 3.78612600  | -1.35553800 | 1.66238600  |
| O  | 5.83318200  | -0.48100100 | 0.07653900  |
| C  | 3.64062900  | -2.20849300 | 4.33907500  |
| W  | -3.28428800 | -1.81942900 | 0.22997100  |
| W  | -0.43356800 | -2.84677300 | 2.23235200  |
| W  | -0.47339500 | -3.37531300 | -1.46667700 |
| Si | 2.49778600  | -2.41652800 | -2.54574700 |
| O  | -4.77192600 | -2.61920200 | 0.36496700  |
| O  | -0.63897400 | -4.28769300 | 3.10365600  |
| O  | -0.70029000 | -4.99793100 | -1.90478100 |
| O  | -3.47117000 | -0.27900700 | 1.35360100  |
| O  | -2.22010000 | -2.55855400 | 1.65809300  |
| O  | -2.24982500 | -2.93210000 | -0.94974300 |
| O  | -0.10111700 | -3.35117700 | 0.41169100  |
| O  | -0.51828500 | -2.41469700 | -3.12314700 |
| O  | 1.55274100  | -2.74227700 | 2.34314800  |
| O  | 1.51139400  | -3.32466000 | -1.65176000 |
| O  | -0.53862500 | -0.69298800 | -1.21647700 |
| O  | 3.76144200  | -1.79350400 | -1.41025500 |
| C  | 3.54326400  | -3.30847200 | -3.77029400 |
| W  | -2.86208600 | 0.97625700  | -2.03737900 |
| W  | -0.06146400 | -0.56811400 | -3.59221100 |
| W  | 0.31246500  | 2.86069700  | -2.23847400 |
| Si | 3.10328100  | 2.82523900  | -0.50254200 |
| O  | -4.18750000 | 1.59612300  | -2.89115600 |
| O  | 0.06640500  | -0.69616000 | -5.28104100 |
| O  | 0.28805400  | 4.06193000  | -3.43608100 |
| O  | -3.51236000 | -0.65212300 | -1.27459400 |
| O  | -1.86378500 | 0.02649400  | -3.38905700 |
| O  | -1.51170500 | 2.33935100  | -2.19040800 |

|    |            |             |             |
|----|------------|-------------|-------------|
| O  | 0.51919200 | 1.21293200  | -3.22918200 |
| O  | 0.12768700 | 3.87129400  | -0.60832100 |
| O  | 1.78423500 | -1.04930200 | -3.03216000 |
| O  | 2.26291400 | 2.83721000  | -1.87912700 |
| O  | 0.61705300 | 1.38725800  | -0.25157300 |
| O  | 3.56364200 | 1.10134000  | -0.23732700 |
| C  | 4.79341400 | 3.55282800  | -0.63817000 |
| H  | 2.91152700 | -3.70465900 | -4.57261400 |
| H  | 4.28315900 | -2.64016500 | -4.22046100 |
| H  | 4.06454000 | -4.14959700 | -3.30394600 |
| H  | 4.72919700 | 4.64253400  | -0.72184800 |
| H  | 5.39311900 | 3.31760500  | 0.24735000  |
| H  | 5.31063400 | 3.17585700  | -1.52623000 |
| H  | 3.02599800 | -2.42163600 | 5.22020000  |
| H  | 4.17929200 | -3.12335800 | 4.07487800  |
| H  | 4.36699800 | -1.43770900 | 4.61394000  |
| Os | 3.48560300 | -0.67724700 | 0.00057300  |
| O  | 6.35480800 | 0.31483900  | -0.71871800 |
| C  | 8.29188100 | 1.16058000  | 1.23293300  |
| C  | 8.83475100 | 1.11510100  | -0.00005100 |
| H  | 7.95147100 | 2.12442900  | 1.61887700  |
| H  | 8.94541800 | 2.00736200  | -0.61160200 |
| H  | 9.20783900 | 0.18153500  | -0.41943600 |
| C  | 8.08232900 | -0.01505600 | 2.10299800  |
| H  | 7.00532000 | -0.18580000 | 2.26716400  |
| H  | 8.50714200 | -0.92980800 | 1.67707500  |
| H  | 8.50957400 | 0.14253800  | 3.10199500  |

**TS2 (s=1)**

|    |             |             |             |
|----|-------------|-------------|-------------|
| W  | 3.11840400  | -1.66601100 | 0.99735900  |
| W  | -0.05714800 | -3.56553700 | 0.94143400  |
| W  | 0.59734600  | -0.90001800 | 3.42347000  |
| Si | -2.03572100 | 1.14000000  | 3.49184700  |
| P  | -0.30695400 | 0.02933700  | 0.09984400  |
| O  | 4.52351000  | -2.53153400 | 1.38476100  |
| O  | 0.15713000  | -5.13041800 | 1.56177100  |
| O  | 0.74228000  | -1.45583700 | 5.02281900  |
| O  | 3.13004400  | -1.62690700 | -0.92275400 |
| O  | 1.74313000  | -2.98763000 | 0.78395000  |
| O  | 2.32079800  | -1.33206900 | 2.72227200  |
| O  | -0.08727500 | -2.43118400 | 2.49061600  |
| O  | 1.06949200  | 0.98723700  | 3.66341500  |
| O  | -2.04172400 | -3.55410500 | 0.90944200  |
| O  | -1.28456000 | -0.29219200 | 3.40486100  |



|    |             |             |             |
|----|-------------|-------------|-------------|
| O  | 0.66047800  | 0.18328400  | 1.27671300  |
| O  | -1.69038900 | 0.77255400  | 0.55904000  |
| O  | -3.47807300 | 0.97830300  | 2.46852400  |
| O  | -5.46003400 | 0.26250700  | 1.14464600  |
| C  | -2.84426600 | 1.52444800  | 5.10675200  |
| W  | 3.28810800  | 1.80711200  | -0.04331800 |
| W  | 0.81219000  | 2.50092600  | 2.52229500  |
| W  | 0.22734700  | 3.46088000  | -1.03593500 |
| Si | -2.87835100 | 2.56876000  | -1.71072300 |
| O  | 4.77385800  | 2.62197800  | -0.07568500 |
| O  | 1.15728000  | 3.82374900  | 3.52800700  |
| O  | 0.33732000  | 5.13083200  | -1.32298200 |
| O  | 3.68654600  | 0.14371700  | 0.83516400  |
| O  | 2.48614100  | 2.34023200  | 1.61086900  |
| O  | 2.07077200  | 3.01718500  | -0.91394100 |
| O  | 0.20686900  | 3.25326200  | 0.85724300  |
| O  | -0.02623000 | 2.71741700  | -2.79536100 |
| O  | -1.11571400 | 2.33017200  | 2.90399700  |
| O  | -1.75397400 | 3.33823900  | -0.85720400 |
| O  | 0.23105000  | 0.84413300  | -1.08085300 |
| O  | -3.92029900 | 1.78371100  | -0.46327200 |
| C  | -4.11251100 | 3.63407800  | -2.56906800 |
| W  | 2.51974600  | -0.75520000 | -2.50165600 |
| W  | -0.53040600 | 0.92779400  | -3.37381900 |
| W  | -0.66760600 | -2.63880100 | -2.38337300 |
| Si | -3.06732200 | -2.96595600 | -0.18242300 |
| O  | 3.65273000  | -1.21246700 | -3.67672200 |
| O  | -0.90914400 | 1.20641800  | -5.00767000 |
| O  | -0.83583800 | -3.67388900 | -3.71786100 |
| O  | 3.24521900  | 0.80954100  | -1.68177300 |
| O  | 1.26497100  | 0.33458100  | -3.50688000 |
| O  | 1.14928500  | -2.09391900 | -2.55767600 |
| O  | -1.05922900 | -0.90071000 | -3.09394500 |
| O  | -0.17039600 | -3.84899500 | -0.96316100 |
| O  | -2.30231200 | 1.30946200  | -2.53537000 |
| O  | -2.52718600 | -2.77059800 | -1.68671200 |
| O  | -0.65768400 | -1.42335600 | -0.22936700 |
| O  | -3.35556600 | -1.30887000 | 0.45439100  |
| C  | -4.77121800 | -3.67074700 | -0.08424000 |
| H  | -4.53756800 | 4.37574000  | -1.88642000 |
| H  | -3.62511000 | 4.17211100  | -3.38907700 |
| H  | -4.92366300 | 3.03561800  | -2.99502500 |
| H  | -5.40060100 | -3.26439900 | -0.88185800 |
| H  | -4.73063300 | -4.75789600 | -0.20837700 |

|    |             |             |             |
|----|-------------|-------------|-------------|
| H  | -5.23267900 | -3.46100600 | 0.88621100  |
| H  | -2.07273800 | 1.64935300  | 5.87411400  |
| H  | -3.41967000 | 2.45306000  | 5.04882700  |
| H  | -3.51086500 | 0.71584100  | 5.42011400  |
| Os | -3.56878000 | 0.44342400  | 0.70198400  |
| O  | -5.81453900 | -0.15337800 | -0.10064100 |
| C  | -7.57527500 | -0.88052600 | -0.06836800 |
| C  | -8.16787800 | 0.35766400  | -0.27740900 |
| H  | -7.52576500 | -1.30487400 | 0.93215000  |
| H  | -7.43891800 | -1.57185100 | -0.89496400 |
| H  | -8.31605800 | 0.68537100  | -1.30749700 |
| C  | -8.48491000 | 1.30455500  | 0.79382700  |
| H  | -7.82518900 | 2.18443300  | 0.71461500  |
| H  | -9.50115100 | 1.70643800  | 0.67523900  |
| H  | -8.37250000 | 0.87715200  | 1.79356900  |

**TS2 (s=3)**

|    |             |             |             |
|----|-------------|-------------|-------------|
| W  | -3.44946400 | 0.97331200  | 0.83706900  |
| W  | -0.77176200 | 3.53377800  | 0.89917000  |
| W  | -0.92044800 | 0.81216900  | 3.41010100  |
| Si | 2.07922500  | -0.57259200 | 3.65066800  |
| P  | 0.34203400  | 0.08624900  | 0.12702700  |
| O  | -5.02569000 | 1.49094000  | 1.18523000  |
| O  | -1.35281600 | 5.01410300  | 1.48929900  |
| O  | -1.30447800 | 1.34526500  | 4.97695800  |
| O  | -3.38814100 | 0.90630800  | -1.07171000 |
| O  | -2.40264200 | 2.56752800  | 0.68014000  |
| O  | -2.63107900 | 0.79831900  | 2.58172500  |
| O  | -0.55414900 | 2.44438000  | 2.46666400  |
| O  | -0.94473000 | -1.12894100 | 3.67778900  |
| O  | 1.15825200  | 3.95698000  | 0.92696200  |
| O  | 1.06092700  | 0.67179400  | 3.54474700  |
| O  | -0.48796300 | -0.30120100 | 1.34632000  |
| O  | 1.90572300  | -0.36809200 | 0.44822600  |
| O  | 3.46075400  | -0.10833800 | 2.58756500  |
| O  | 5.42527800  | 0.91525200  | 1.52043000  |
| C  | 2.96971200  | -0.77212700 | 5.25132300  |
| W  | -2.77754900 | -2.46485000 | -0.14722000 |
| W  | -0.32208600 | -2.54203000 | 2.53793000  |
| W  | 0.62923000  | -3.40410900 | -0.96350300 |
| Si | 3.46998100  | -1.82121400 | -1.52416200 |
| O  | -4.03263100 | -3.60277400 | -0.19997100 |
| O  | -0.39522500 | -3.90055400 | 3.55242900  |
| O  | 0.87552900  | -5.06229600 | -1.23001900 |

|    |             |             |             |
|----|-------------|-------------|-------------|
| O  | -3.55956100 | -0.92444500 | 0.69046700  |
| O  | -1.93251900 | -2.75577700 | 1.56205000  |
| O  | -1.27816000 | -3.37136300 | -0.91500600 |
| O  | 0.52886600  | -3.16850800 | 0.92222300  |
| O  | 0.74516600  | -2.61731400 | -2.71592800 |
| O  | 1.51754500  | -1.92391800 | 2.98281100  |
| O  | 2.52988300  | -2.87254700 | -0.74576700 |
| O  | -0.02787700 | -0.82684100 | -1.04528900 |
| O  | 4.30708200  | -0.82654400 | -0.30755500 |
| C  | 4.90985700  | -2.59694900 | -2.38703000 |
| W  | -2.51713900 | 0.17666500  | -2.61199800 |
| W  | 0.87231500  | -0.76913900 | -3.31152100 |
| W  | 0.14300300  | 2.74697000  | -2.38933900 |
| Si | 2.33923400  | 3.61718600  | -0.12019800 |
| O  | -3.66640800 | 0.36148500  | -3.84398100 |
| O  | 1.38062900  | -0.97182200 | -4.92041300 |
| O  | 0.10844400  | 3.77269400  | -3.74017200 |
| O  | -2.91852600 | -1.51146100 | -1.80045600 |
| O  | -1.00897200 | -0.60431700 | -3.53840600 |
| O  | -1.49163900 | 1.79041100  | -2.61481000 |
| O  | 0.95203200  | 1.13174500  | -3.04562600 |
| O  | -0.66656700 | 3.81840600  | -1.00802500 |
| O  | 2.63609900  | -0.74251700 | -2.39083800 |
| O  | 1.89025800  | 3.30570000  | -1.63928300 |
| O  | 0.32768300  | 1.57497500  | -0.20003600 |
| O  | 2.96092300  | 2.05940700  | 0.50318200  |
| C  | 3.82351500  | 4.69829300  | 0.03491700  |
| H  | 4.53760600  | -3.19063700 | -3.22961100 |
| H  | 5.60661200  | -1.85686900 | -2.79456800 |
| H  | 5.45775800  | -3.27639500 | -1.72628000 |
| H  | 3.56095800  | 5.72989000  | -0.22153200 |
| H  | 4.20792300  | 4.69262600  | 1.05948500  |
| H  | 4.61878600  | 4.37175700  | -0.64196500 |
| H  | 2.25340800  | -1.05670500 | 6.02965100  |
| H  | 3.72918900  | -1.55642000 | 5.18558900  |
| H  | 3.44956500  | 0.16275200  | 5.55510700  |
| Os | 3.58655400  | 0.41753100  | 0.85476300  |
| O  | 5.51468600  | 1.46186000  | 0.27038200  |
| C  | 7.72164900  | 0.00186500  | 0.11961500  |
| C  | 6.87314300  | 0.67794000  | -0.77167200 |
| H  | 8.53506900  | 0.56603100  | 0.57900400  |
| H  | 7.17813800  | 1.64134100  | -1.17316800 |
| H  | 6.20065600  | 0.09555000  | -1.39802200 |
| C  | 7.50833700  | -1.38434400 | 0.56302000  |

|   |            |             |            |
|---|------------|-------------|------------|
| H | 6.70848800 | -1.88430000 | 0.00994100 |
| H | 8.43236400 | -1.97344100 | 0.48853500 |
| H | 7.24018200 | -1.39524000 | 1.63158700 |

**TS2 (s=5)**

|    |             |             |             |
|----|-------------|-------------|-------------|
| W  | -2.77052400 | 1.09033300  | 2.11286100  |
| W  | 0.35183800  | 3.07961900  | 1.93170400  |
| W  | 0.20791300  | -0.24846200 | 3.54740200  |
| Si | 2.73881200  | -2.08364000 | 2.42685500  |
| P  | 0.24622700  | -0.00050500 | -0.03045000 |
| O  | -4.03477500 | 1.71510200  | 3.05316800  |
| O  | 0.35783200  | 4.35594100  | 3.05031300  |
| O  | 0.45087400  | -0.24594700 | 5.22997600  |
| O  | -3.20971400 | 1.65882300  | 0.33470600  |
| O  | -1.45112400 | 2.48662600  | 2.03735300  |
| O  | -1.62409500 | 0.26766700  | 3.43073900  |
| O  | 0.69246500  | 1.51699500  | 3.01954400  |
| O  | -0.21831900 | -2.13971000 | 3.24531200  |
| O  | 2.26997900  | 3.09604400  | 1.43722500  |
| O  | 2.03516500  | -0.71115700 | 2.90803100  |
| O  | -0.39273900 | -0.57161500 | 1.23479600  |
| O  | 1.67308100  | -0.82911300 | -0.18097500 |
| O  | 3.89906400  | -1.51890400 | 1.17330400  |
| O  | 5.73296900  | -0.38783600 | -0.43902100 |
| C  | 3.87845400  | -2.90135900 | 3.62211300  |
| W  | -3.24821700 | -1.86698600 | 0.06048100  |
| W  | -0.27028600 | -3.20238400 | 1.65539700  |
| W  | -0.51776900 | -2.95046100 | -2.06136000 |
| Si | 2.35581000  | -1.67968500 | -3.07760400 |
| O  | -4.71502500 | -2.71484800 | 0.09992700  |
| O  | -0.39974200 | -4.79318900 | 2.23130700  |
| O  | -0.72588700 | -4.44670800 | -2.83554900 |
| O  | -3.39854500 | -0.60066100 | 1.50160800  |
| O  | -2.09197700 | -2.85323300 | 1.24273600  |
| O  | -2.27782900 | -2.68526700 | -1.38122600 |
| O  | -0.05033100 | -3.34061800 | -0.24991400 |
| O  | -0.68382300 | -1.66728200 | -3.48087500 |
| O  | 1.71368800  | -3.06116900 | 1.65824300  |
| O  | 1.44542900  | -2.77345100 | -2.32096800 |
| O  | -0.57179500 | -0.43169300 | -1.24744700 |
| O  | 3.68622500  | -1.29038600 | -1.92771700 |
| C  | 3.31153700  | -2.28548200 | -4.53160100 |
| W  | -3.02247800 | 1.38212900  | -1.54061800 |
| W  | -0.30154900 | 0.24443700  | -3.56227000 |

|    |             |             |             |
|----|-------------|-------------|-------------|
| W  | 0.12965900  | 3.32061500  | -1.55330100 |
| Si | 3.00378200  | 3.00612500  | 0.00157100  |
| O  | -4.39644300 | 2.12399700  | -2.19996000 |
| O  | -0.29323600 | 0.48544700  | -5.24466200 |
| O  | -0.00082900 | 4.74039700  | -2.47370400 |
| O  | -3.57198400 | -0.40700100 | -1.13082500 |
| O  | -2.07639800 | 0.74388500  | -3.10943900 |
| O  | -1.69030300 | 2.75801200  | -1.47251500 |
| O  | 0.29037100  | 1.93450400  | -2.86937900 |
| O  | 0.02088600  | 3.97890700  | 0.26446700  |
| O  | 1.59761300  | -0.26312600 | -3.23989900 |
| O  | 2.09306800  | 3.30503800  | -1.29853000 |
| O  | 0.57268500  | 1.48469100  | 0.03129200  |
| O  | 3.53046000  | 1.29706900  | -0.16496400 |
| C  | 4.64084000  | 3.85843400  | -0.03495500 |
| H  | 2.61950300  | -2.53929600 | -5.34193500 |
| H  | 3.99783500  | -1.51855000 | -4.90281900 |
| H  | 3.88502800  | -3.18355400 | -4.28400400 |
| H  | 4.49076800  | 4.93991100  | 0.04843200  |
| H  | 5.26831800  | 3.54125000  | 0.80384300  |
| H  | 5.16947400  | 3.66463200  | -0.97354000 |
| H  | 3.30167900  | -3.27959500 | 4.47307800  |
| H  | 4.39255700  | -3.74989700 | 3.16098500  |
| H  | 4.62451300  | -2.19974000 | 4.00658400  |
| Os | 3.52858200  | -0.49880500 | -0.29291400 |
| O  | 6.21815600  | 0.80330900  | -0.25906400 |
| C  | 8.50874700  | -0.21743300 | 0.40714000  |
| C  | 7.95193300  | 0.76888800  | -0.44830300 |
| H  | 8.75895900  | 0.07635300  | 1.42714400  |
| H  | 8.09740800  | 1.81739600  | -0.19136600 |
| H  | 7.96592500  | 0.56897600  | -1.52044600 |
| C  | 8.64019000  | -1.63897200 | 0.03461200  |
| H  | 7.93844700  | -2.25721400 | 0.61575300  |
| H  | 8.43935800  | -1.81580200 | -1.02642600 |
| H  | 9.64046800  | -2.02231800 | 0.27623700  |

#### IM4

|    |             |             |            |
|----|-------------|-------------|------------|
| W  | 2.76634900  | -1.77706000 | 0.55780700 |
| W  | -0.41931400 | -3.60272900 | 1.05669200 |
| W  | 0.70498700  | -0.98144200 | 3.42214600 |
| Si | -1.73931700 | 1.19514200  | 3.98979500 |
| P  | -0.71722300 | 0.04208600  | 0.26930800 |
| O  | 4.19030100  | -2.68312100 | 0.71329000 |
| O  | -0.12979800 | -5.17918300 | 1.60888200 |

|    |             |             |             |
|----|-------------|-------------|-------------|
| O  | 1.15903000  | -1.59227200 | 4.93965900  |
| O  | 2.41860200  | -1.71606800 | -1.32772600 |
| O  | 1.34174400  | -3.06455600 | 0.60690600  |
| O  | 2.24932600  | -1.38437900 | 2.37145400  |
| O  | -0.16463600 | -2.46239100 | 2.60736400  |
| O  | 1.30498900  | 0.88867600  | 3.61568200  |
| O  | -2.35692500 | -3.54692500 | 1.40196500  |
| O  | -1.11676300 | -0.28462500 | 3.84881500  |
| O  | 0.26070800  | 0.24355400  | 1.42834800  |
| O  | -2.09240600 | 0.80656900  | 0.66674000  |
| O  | -3.30296300 | 1.11739100  | 3.04254700  |
| O  | -5.53185900 | 0.32742200  | 1.90802300  |
| C  | -2.42389200 | 1.64808400  | 5.63471600  |
| W  | 2.89504000  | 1.70623200  | -0.49516600 |
| W  | 0.95239100  | 2.40255800  | 2.51632900  |
| W  | -0.19015900 | 3.55602400  | -0.84330800 |
| Si | -3.40926600 | 2.82639200  | -0.93734700 |
| O  | 4.39098400  | 2.46136400  | -0.74624300 |
| O  | 1.52920100  | 3.68674000  | 3.46346000  |
| O  | -0.00469100 | 5.21792200  | -1.12937000 |
| O  | 3.35050000  | 0.00915200  | 0.29503700  |
| O  | 2.39737700  | 2.18067700  | 1.31096300  |
| O  | 1.62589500  | 2.99908800  | -1.07938900 |
| O  | 0.09391800  | 3.25491800  | 0.99642900  |
| O  | -0.74146000 | 2.79747300  | -2.52412500 |
| O  | -0.92274200 | 2.33189700  | 3.20235400  |
| O  | -2.11329800 | 3.58732700  | -0.36234600 |
| O  | -0.18410700 | 0.76987800  | -0.96983300 |
| O  | -4.23125900 | 2.07388900  | 0.46026100  |
| C  | -4.73121800 | 3.94502200  | -1.57139100 |
| W  | 1.58896800  | -0.77955000 | -2.76617000 |
| W  | -1.44572300 | 1.05773300  | -3.02336800 |
| W  | -1.58942900 | -2.52603200 | -2.03619300 |
| Si | -3.53760200 | -2.76504600 | 0.61977700  |
| O  | 2.46626300  | -1.29021000 | -4.12150100 |
| O  | -2.14740600 | 1.37735500  | -4.53984900 |
| O  | -2.11470100 | -3.49356500 | -3.33033500 |
| O  | 2.55535300  | 0.73885500  | -2.11302700 |
| O  | 0.23581400  | 0.37193300  | -3.55375700 |
| O  | 0.16408400  | -2.05974600 | -2.59593000 |
| O  | -2.03700600 | -0.72846200 | -2.62024500 |
| O  | -0.88761200 | -3.83331800 | -0.80202500 |
| O  | -3.01370900 | 1.57611600  | -1.87932800 |
| O  | -3.26570400 | -2.56089700 | -0.96364700 |

|    |             |             |             |
|----|-------------|-------------|-------------|
| O  | -1.05173200 | -1.43427900 | 0.03719200  |
| O  | -3.41665800 | -1.20295200 | 1.46645400  |
| C  | -5.23623900 | -3.34761300 | 1.04119300  |
| H  | -5.09410200 | 4.61337000  | -0.78434900 |
| H  | -4.32490500 | 4.56718800  | -2.37621600 |
| H  | -5.58453600 | 3.39244200  | -1.97791900 |
| H  | -5.99854700 | -2.72778200 | 0.56004000  |
| H  | -5.36539300 | -4.38154200 | 0.70309400  |
| H  | -5.39872800 | -3.32418100 | 2.12320500  |
| H  | -1.60753300 | 1.76245800  | 6.35572000  |
| H  | -2.96677000 | 2.59647900  | 5.58252300  |
| H  | -3.10012500 | 0.87363800  | 6.00831000  |
| Os | -3.88010600 | 0.55123400  | 1.43208400  |
| O  | -4.99308900 | -0.44772100 | -0.47366600 |
| C  | -5.10953900 | -0.52863700 | -1.91592700 |
| C  | -6.12763000 | 0.17400300  | -1.13785700 |
| H  | -5.29118300 | -1.55387300 | -2.23630500 |
| H  | -4.35141200 | 0.02511300  | -2.45863900 |
| H  | -6.05164900 | 1.26444500  | -1.11315400 |
| C  | -7.46297300 | -0.40280300 | -0.80700000 |
| H  | -7.76706900 | -0.13557800 | 0.21055400  |
| H  | -8.21733000 | -0.00927200 | -1.49702300 |
| H  | -7.45752600 | -1.49388600 | -0.89809400 |
